# Supplementary material for: The highly rugged yet navigable regulatory landscape of the bacterial transcription factor TetR
Source: Springer Nature journal article supplement (doi:10.1038/s41467-024-54723-y), 2024-12-30
Supplement: MOESM1 [file 41467_2024_54723_MOESM1_ESM.pdf]

1 The highly rugged yet navigable regulatory landscape of the bacterial transcription factor  
2 TetR

3  
4  
5  
6  
7  
8 **Authors**

9 Cauã Antunes Westmann<sup>1,2</sup>, Leander Goldbach<sup>1,2</sup>, Andreas Wagner<sup>1,2,3\*</sup>

10 <sup>1</sup> – Department of Evolutionary Biology and Environmental Studies, University of Zurich,  
11 Winterthurerstrasse 190, Zurich CH-8057, Switzerland

12 <sup>2</sup> – Swiss Institute of Bioinformatics, Quartier Sorge-Batiment Genopode, 1015 Lausanne,  
13 Switzerland

14 <sup>3</sup> – The Santa Fe Institute, Santa Fe, NM 87501, USA

15 \* - Corresponding author: [andreas.wagner@ieu.uzh.ch](mailto:andreas.wagner@ieu.uzh.ch)

|    |                                                                                                        |
|----|--------------------------------------------------------------------------------------------------------|
| 18 | <b>Supplementary Information</b>                                                                       |
| 19 |                                                                                                        |
| 20 | <b>Index</b>                                                                                           |
| 21 |                                                                                                        |
| 22 | <b>Supplementary Tables</b>                                                                            |
| 23 | <b>S1. Network metrics</b>                                                                             |
| 24 | <b>S2. Table of strains</b>                                                                            |
| 25 | <b>S3. Table of plasmids</b>                                                                           |
| 26 | <b>S4. Primers for engineering the pCAW-sort-seq plasmid</b>                                           |
| 27 | <b>S5. Primers for constructing libraries</b>                                                          |
| 28 | <b>S6. Primers with barcodes for sequencing bins</b>                                                   |
| 29 |                                                                                                        |
| 30 | <b>Supplementary Figures</b>                                                                           |
| 31 | <b>S1. The pCAW-SortSeq-TetR plasmid.</b>                                                              |
| 32 | <b>S2. The repression measurement module of the pCAW-SortSeq-TetR plasmid</b>                          |
| 33 | <b>S3 Validating the pCAW-SortSeq-TetR plasmid with <i>tetO2</i> mutants</b>                           |
| 34 | <b>S4. Flow cytometry gating and fluorescence expression levels for controls and library</b>           |
| 35 | <b>S5. Distribution of fluorescence levels after sorting of cells with the library into bins.</b>      |
| 36 | <b>S6. Distribution of sequence reads per bins</b>                                                     |
| 37 | <b>S7. Number of genotypes obtained by choosing different sequencing depth (read count)</b>            |
| 38 | <b>cutoffs</b>                                                                                         |
| 39 | <b>S8. Number of bins per genotype</b>                                                                 |
| 40 | <b>S9. Correlation of read coverage in the <i>tetO2</i> mutant library</b>                             |
| 41 | <b>S10. Genotypes per fluorescence bin and overlaps between them</b>                                   |
| 42 | <b>S11. Reproducibility of estimated repression levels</b>                                             |
| 43 | <b>S12. Validation of regulatory strength differences in the lowest bins</b>                           |
| 44 | <b>S13. DNA Sequence LOGO obtained by a previous study</b>                                             |
| 45 | <b>S14. Quantitative analysis of TetR landscape sparsity</b>                                           |
| 46 | <b>S15. The contribution of individual <i>tetO2</i> nucleotides in principal component analysis</b>    |
| 47 | <b>S16. Principal component analysis (PCA) of repression strength peaks in genotype</b>                |
| 48 | <b>space</b>                                                                                           |
| 49 | <b>S17. The distribution of basin sizes among peaks</b>                                                |
| 50 | <b>S18. Adaptive walks in which each mutational step is chosen with uniform probability</b>            |
| 51 | <b>among all repression-increasing steps</b>                                                           |
| 52 | <b>S19. Adaptive walks using the Kimura model with different population sizes</b>                      |
| 53 | <b>S20. Greedy adaptive walk simulations</b>                                                           |
| 54 | <b>S21. The effect of distinct experimental noise values (<math>\tau</math>) on landscape features</b> |
| 55 | <b>S22. The effect of experimental measurement noise on high peak attainability.</b>                   |
| 56 | <b>S23. Experimental noise values have little impact on genotype visitation during adaptive</b>        |
| 57 | <b>walks</b>                                                                                           |
| 58 | <b>S24. Epistatic interactions</b>                                                                     |

Supplementary Tables

**Table S1. Network metrics**

|                                                  |               |
|--------------------------------------------------|---------------|
| Number of nodes (genotypes)                      | 17,765        |
| Number of peaks                                  | 2,092         |
| Number of low peaks <sup>1</sup>                 | 2,034 (97.2%) |
| Number of high peaks <sup>2</sup>                | 58 (2.8%)     |
| Number of squares <sup>3</sup>                   | 83,100        |
| Magnitude epistasis or additivity <sup>4,5</sup> | 35%           |
| Simple sign epistasis <sup>5</sup>               | 34%           |
| Reciprocal sign epistasis <sup>5</sup>           | 30%           |

<sup>1</sup> Low peaks are peaks with repression levels below the wild sequence. Percentages refer to the proportion of all genotypes.

<sup>2</sup> High peaks are peaks with repression levels above the wild-type sequence. Percentages refer to the proportion of all peaks.

<sup>3</sup> A square represents the connection between a focal sequence (ab) and a double mutant (AB) via two single mutants (Ab and aB).

<sup>4</sup> This category includes both magnitude epistasis and additivity (no epistasis) without distinguishing them, because neither of the two subcategories affects peak accessibility <sup>1,2</sup>

<sup>5</sup> Percentages refer to the proportion of all squares.

74 **Table S2. Table of strains**

| Strain                             | Genotype                                                                                                                                                                 |
|------------------------------------|--------------------------------------------------------------------------------------------------------------------------------------------------------------------------|
| SIG10-MAX<br>from Sigma<br>Aldrich | F- mcrA $\Delta$ (mrr-hsdRMS-mcrBC) endA1 recA1 $\Phi$ 80dlacZ $\Delta$ M15<br>$\Delta$ lacX74 araD139 $\Delta$ (ara,leu)7697galU galK rpsL nupG $\lambda$ - tonA (StrR) |

75

76

77 **Table S3. Table of plasmids used in this study**

| Name                     | Selective antibiotics<br>(concentration<br>µg/ml) | Relevant features                               | Source     | T,<br>°C | Description                                                                             |
|--------------------------|---------------------------------------------------|-------------------------------------------------|------------|----------|-----------------------------------------------------------------------------------------|
| <b>pCAW-Sort-Seq</b>     | Chloramphenicol<br>(50)                           | pBBR1,<br>TetR, <i>sfgfp</i>                    | This study | 37       | Vector used<br>for library<br>generation and<br>sort-seq                                |
| <b>pCAW-Sort-Seq-Neg</b> | Chloramphenicol<br>(50)                           | pBBR1,<br>TetR,<br>promoterless<br><i>sfgfp</i> | This study | 37       | pCAW-Sort-Seq vector<br>without a<br>promoter for<br><i>sfgfp</i> (negative<br>control) |

78  
79

80 **Table S4. Primers for engineering the pCAW-sort-seq plasmid**

| Name         | Sequence                        | Function                                                    |
|--------------|---------------------------------|-------------------------------------------------------------|
| pCAW_frag1_F | CGTCCGACTTACGGAAGGTAGATTTTACGGC | Linearizing the pCAW-Sort-Seq fragment1 for Gibson Assembly |
| pCAW_frag1_R | CTCGTGCCTAACGGAAGGTAGATTTTACGGC | Linearizing the pCAW-Sort-Seq fragment1 for Gibson Assembly |
| pCAW_frag2_F | TAAGATTGCCACGGAAGGTAGATTTTACGGC | Linearizing the pCAW-Sort-Seq fragment2 for Gibson Assembly |
| pCAW_frag2_R | AGGCCTGACTACGGAAGGTAGATTTTACGGC | Linearizing the pCAW-Sort-Seq fragment2 for Gibson Assembly |

81

82

83 **Table S5 Primers for constructing libraries**

| <b>Name</b>          | <b>Sequence</b>                                                 | <b>Function</b>                                       |
|----------------------|-----------------------------------------------------------------|-------------------------------------------------------|
| Ultramer_ds_F        | TTCTCAAAAGCTTCCTGC<br>AGTATTC                                   | Amplifying Ultramer® libraries                        |
| Ultramer_ds_R        | CGGAAAGCACATCCGGTG<br>AC                                        | Amplifying Ultramer® libraries                        |
| TFBS_R               | CCGTTTGTAGCATCACCTT<br>C                                        | Sequencing the TFBS region                            |
| pCAW_Gibs_<br>Lib_F  | GTCTGATGAGTCCGTGAG<br>GACG                                      | Linearizing the pCAW-Sort-Seq<br>plasmid              |
| pCAW_Gibs_<br>Lib_R  | GAGAAAAGAAAACCGCC<br>GATCCTG                                    | Linearizing the pCAW-Sort-Seq<br>plasmid              |
| Ultramer_Gibs_<br>_F | GGTGGACAGGATCGGCGG<br>TTTTCTTTTCTCTTCTCAA<br>AAGCTTCCTGCAGTATTC | Amplifying Ultramer® libraries for<br>Gibson Assembly |
| Ultramer_Gibs_<br>_R | GGCTGTTTCGTCCTCACG<br>GACTCATCAGACCGGAAA<br>GCACATCCGGTG        | Amplifying Ultramer® libraries for<br>Gibson Assembly |

84

85

86 **Table S6. Primers with barcodes for demultiplexing sequencing bins:**

| Name     | Sequence                                |
|----------|-----------------------------------------|
| Bin_1_F  | <b>AGTCTCGGCA</b> ACGGAAGGTAGATTTTACGGC |
| Bin_2_F  | <b>GATATAGCTCAC</b> GGAAGGTAGATTTTACGGC |
| Bin_3_F  | <b>CGTCCGACTTAC</b> GGAAGGTAGATTTTACGGC |
| Bin_4_F  | <b>CTCGTGCCTAAC</b> GGAAGGTAGATTTTACGGC |
| Bin_5_F  | <b>TAAGATTGCCAC</b> GGAAGGTAGATTTTACGGC |
| Bin_6_F  | <b>AGGCCTGACTAC</b> GGAAGGTAGATTTTACGGC |
| Bin_7_F  | <b>GTCAATCTTCAC</b> GGAAGGTAGATTTTACGGC |
| Bin_8_F  | <b>ATGACGGTAAAC</b> GGAAGGTAGATTTTACGGC |
| Bin_9_F  | <b>AGGCTCAAGGAC</b> GGAAGGTAGATTTTACGGC |
| Bin_10_F | <b>GCTCAGTAATAC</b> GGAAGGTAGATTTTACGGC |
| Bin_11_F | <b>ACGATGAAGTAC</b> GGAAGGTAGATTTTACGGC |
| Bin_12_F | <b>GAGCAGATATAC</b> GGAAGGTAGATTTTACGGC |
| Bin_13_F | <b>CGATAGCGAGAC</b> GGAAGGTAGATTTTACGGC |
| Bin_R_1  | TCCTCACGGACTCATCAGAC                    |

87 Barcodes are represented in bold letters

88

89

90



## Supplementary figures:

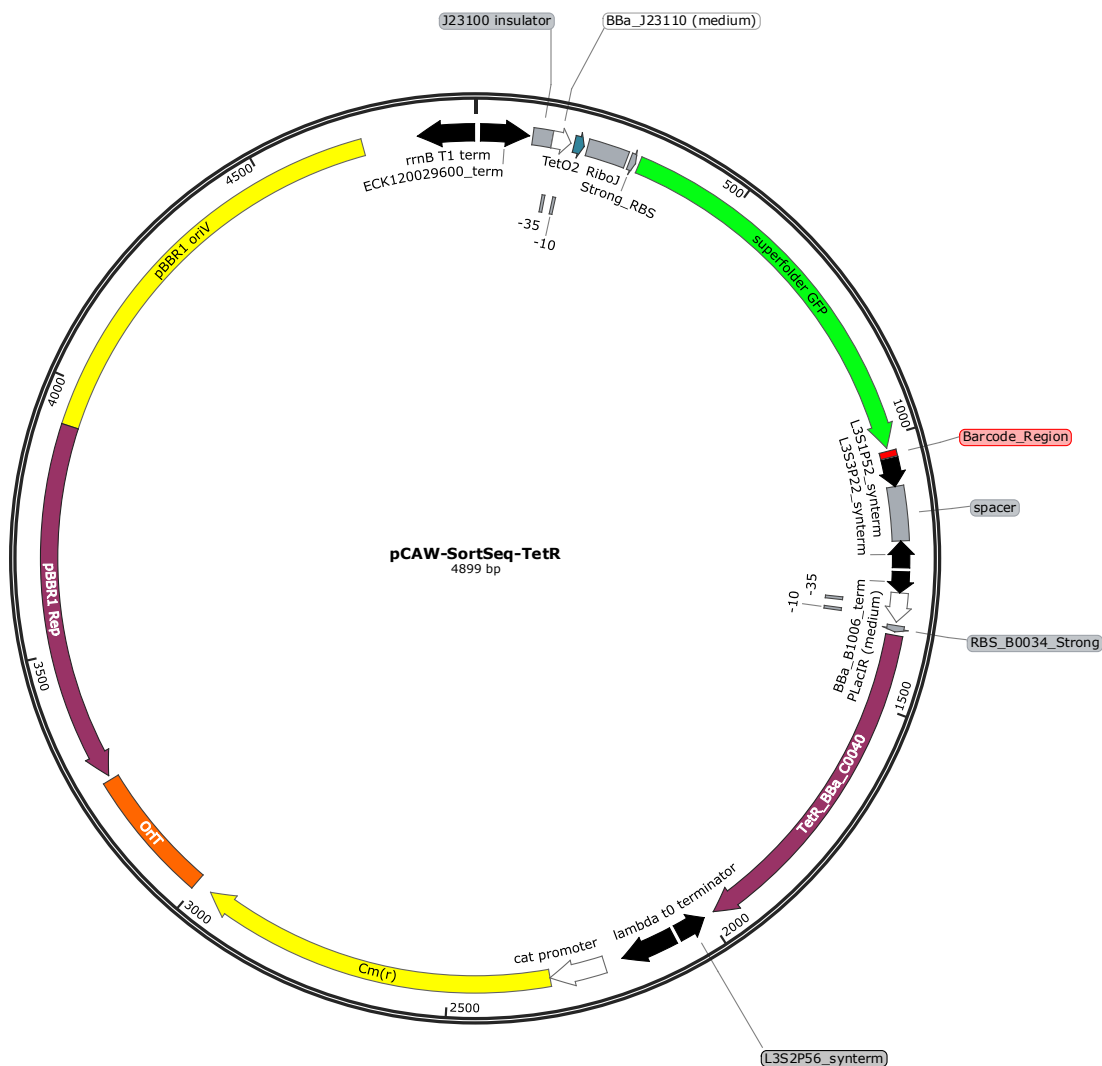

**Supplementary Figure S1. The pCAW-SortSeq-TetR plasmid.** The plasmid system pCAW-SortSeq encodes a broad-host, low-copy number replication origin (pBBR1 replication origin – 5 to 10 copies)<sup>3</sup>, an interchangeable regulatory region where the TFBS is located and placed between a constitutive promoter (BBa\_J23110<sup>4,5</sup>), a superfolder GFP (*sfgfp*) fluorescent reporter gene<sup>6</sup>, as well as a *tetr* gene. The *tetr* gene is derived from the original Tn10 transposon<sup>7,8</sup> under the control of a low-strength constitutive promoter (pLac promoter variant developed by<sup>9</sup>).

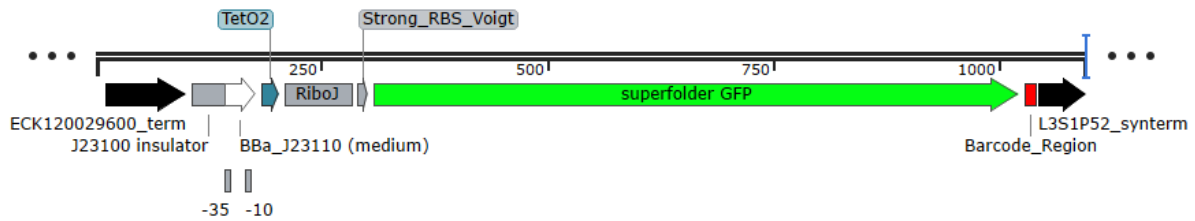

**Supplementary Figure S2. The repression measurement module of the pCAW-SortSeq-TetR plasmid.** This module encodes the promoter insulator *J23100\_Insulator* upstream of the *BBa\_J23110* constitutive promoter from <sup>10</sup>. Promoter insulators are transcriptional terminators that alleviate contextual effects of upstream sequences on promoter regions. Bold underlined letters represent -35 and -10 boxes. The constitutive promoter of this module is the *BBa\_J23110* promoter from the iGEM registry of parts ([http://parts.igem.org/Part:BBa\\_J23110](http://parts.igem.org/Part:BBa_J23110))<sup>4,5</sup>, which has medium promoter strength. We placed the *tetO2* sequence<sup>11</sup> at the +10 position relative to the *sfgfp* transcription start site, which is the optimal distance for synthetic repression <sup>12</sup>. The transcriptional insulator RiboJ has been described in <sup>13</sup>. It is a synthetic ribozyme that removes 5'UTR interferences with variable TFBS sequences in the mRNA by self-cleavage with high efficiency<sup>14</sup>. We obtained the strong synthetic RBS sequence from ref. <sup>15</sup>, the reporter gene superfolder GFP (*sfgfp*) from ref. <sup>6</sup>, and the strong synthetic transcriptional terminator (*synterm*) from ref. <sup>16</sup>.

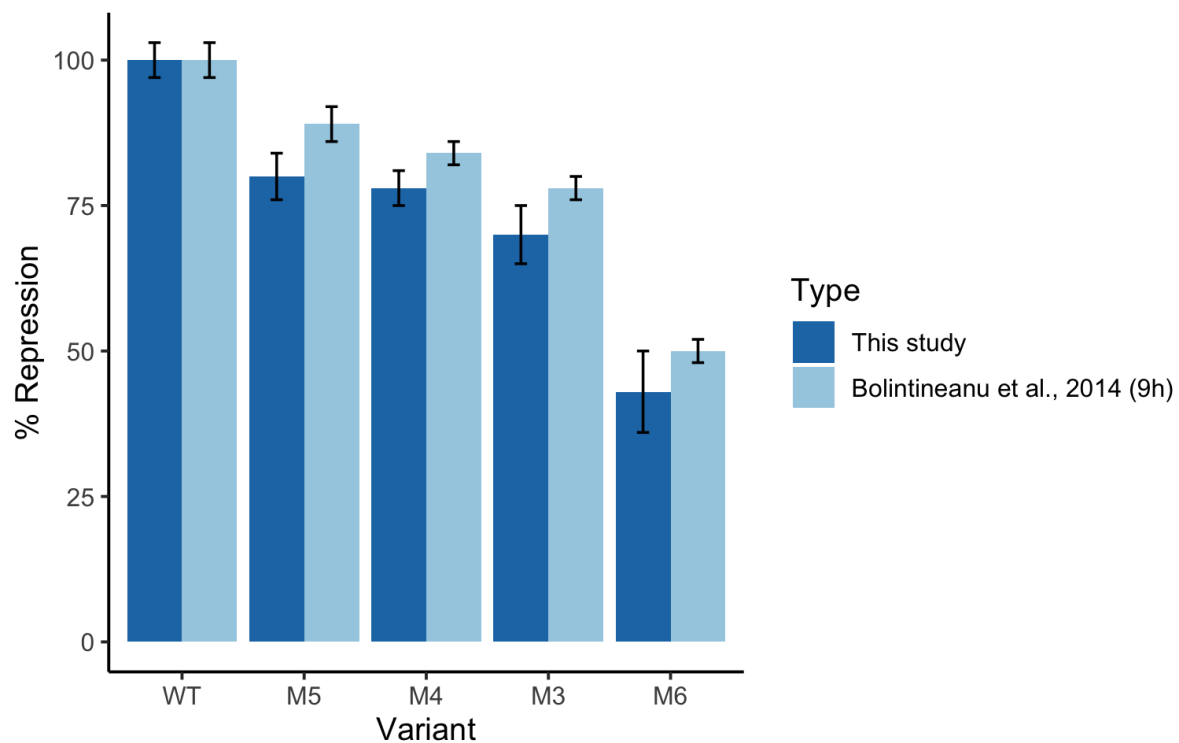

118

### 119 **Supplementary Figure S3. Validating the pCAW-SortSeq-TetR plasmid with *tetO2***

120 **mutants.** We validated the pCAW-SortSeq-TetR plasmid with *tetO2* mutants by measuring  
 121 the percentage of repression (vertical axis) for each of the five *tetO2* variants (WT, M5, M4,  
 122 M3, M6, horizontal axis). For calculating percentages of repression, we measured GFP  
 123 fluorescence distributions for each variant in triplicate in a flow cytometer, divided the mean  
 124 fluorescence (over triplicate measurements) of each variant by the mean of the WT *tetO2*, and  
 125 multiplied by 100. Light blue bars represent the data from a previous study<sup>17</sup> characterizing  
 126 each of the five TetR TFBS variants. Dark blue bars correspond to measurements obtained in  
 127 the present study. Error bars represent standard deviations among replicates. Source data are  
 128 provided with this paper.

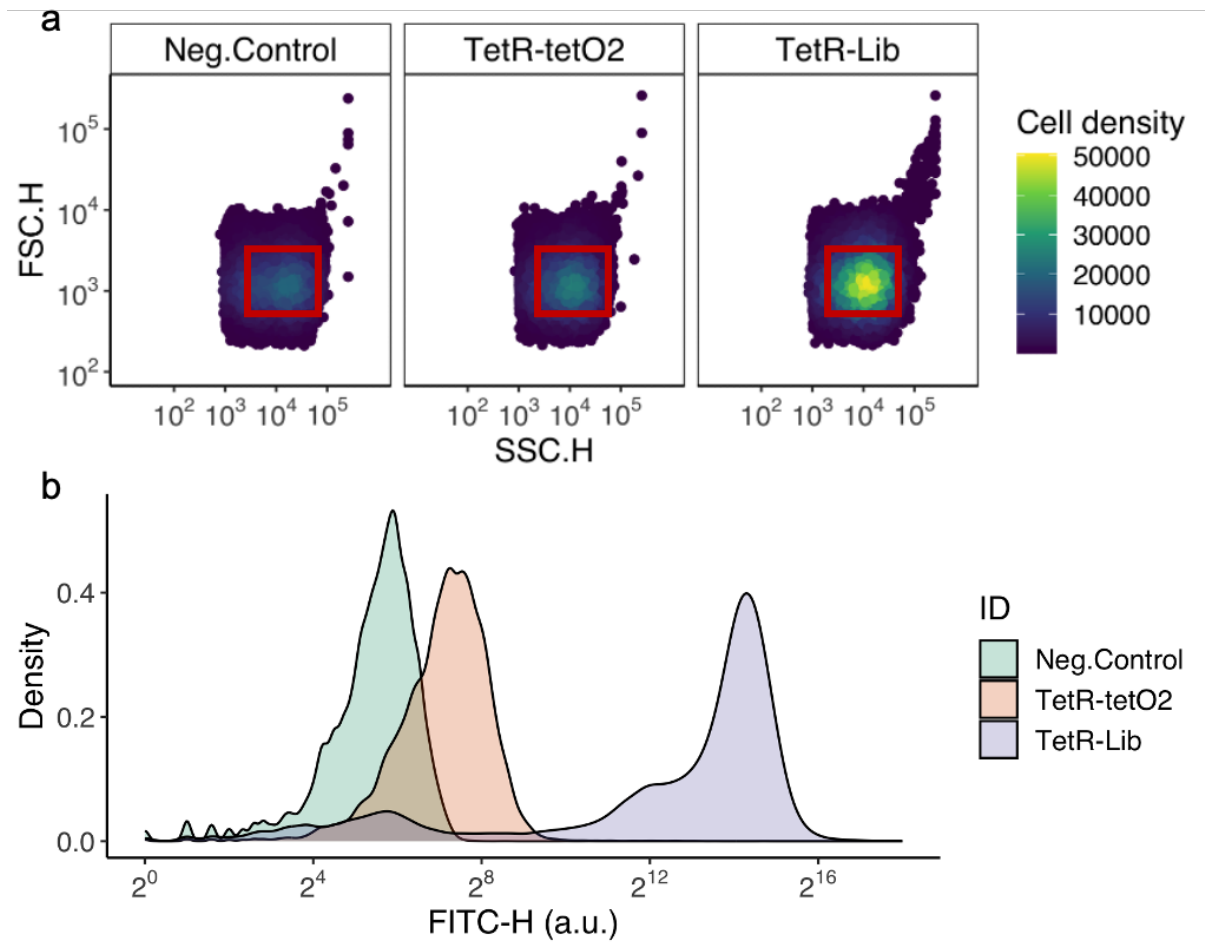

**Supplementary Figure S4. Flow cytometry gating and fluorescence expression levels for controls and library. a. Gating of three representative cell populations.** We measured the forward (FSC.H, vertical axis) and side scatter (SSC.H, horizontal axis) for 200,000 cells per sample. Inside each grid, we depict individual cells as circles. Heatmap colors represent population densities (see color legend). From left to right: cells harbouring a negative control plasmid (pCAW with promoterless GFP), a positive *tetO2* control (pCAW with the wild-type *tetO2* instead of the mutant library), and *tetO2* variants (pCAW with variant library). All populations were grown in the absence of anhydrotetracycline. The red box represents the region of each scatter plot where cell density was the highest, from which cells were sorted in subsequent experiments. Source data are provided with this paper. **b. Fluorescence distributions of three cell populations transformed with different plasmids.** Density plot with the fluorescence distribution for the same three samples described above (see color

142 legend). The horizontal axis represents the range of values for GFP fluorescence as FITC-H  
143 (arbitrary units, note the  $\log_2$  scale). The vertical axis represents the relative frequency of  
144 observations for each fluorescence value on the horizontal axis. Density smoothing was  
145 performed using a Gaussian kernel function to create a smooth density plot – *ggplot2*  
146 package<sup>18</sup>. Source data are provided with this paper.

147

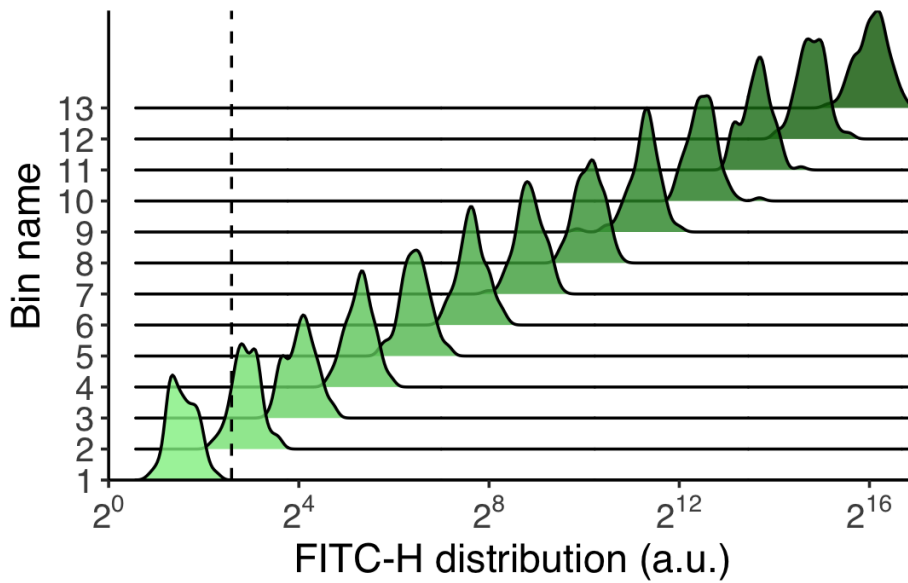

**Supplementary Figure S5. Distribution of fluorescence levels after sorting of cells expressing the library into fluorescence bins.** The distribution of fluorescence values for each bin is shown as individual density plots. The color gradient represents changes in GFP expression levels (as quantified in the FITC-H channel, arbitrary units) across the horizontal axis, with lighter green corresponding to low GFP expression (and thus higher repression) and darker green corresponding to higher GFP expression (and thus weaker repression). The vertical dashed line represents the autofluorescence threshold based on the obtained geometric mean calculated over the fluorescence distribution for the negative control population. We determined the distribution of values for each bin from a population of 200,000 cells. Source data are provided with this paper.

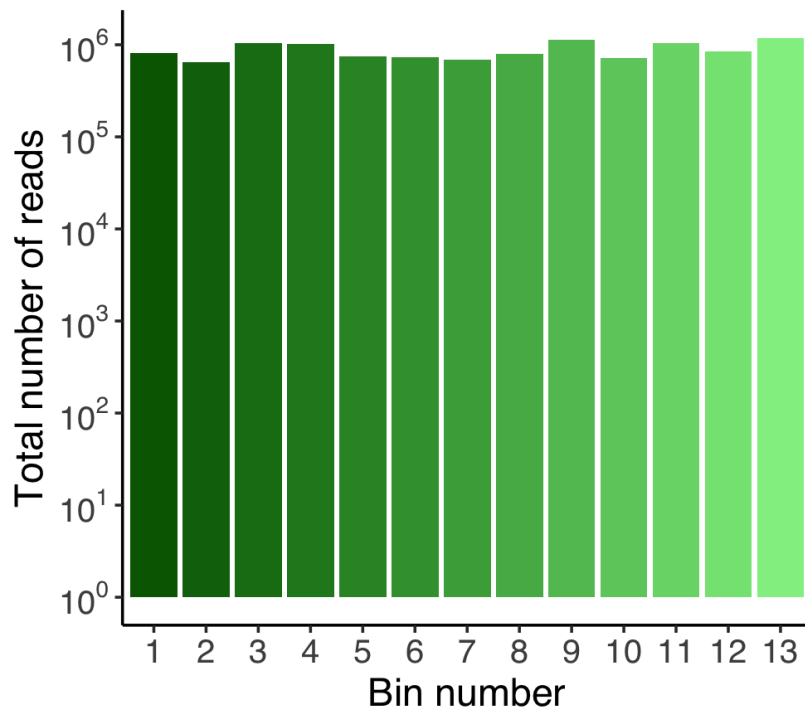

**Supplementary Figure S6. Distribution of sequence reads per bins.** Gradient bar colours depict GFP expression levels across bins. The total number of sequence reads in each bin is represented on the vertical axis on a logarithmic scale. Source data are provided with this paper.

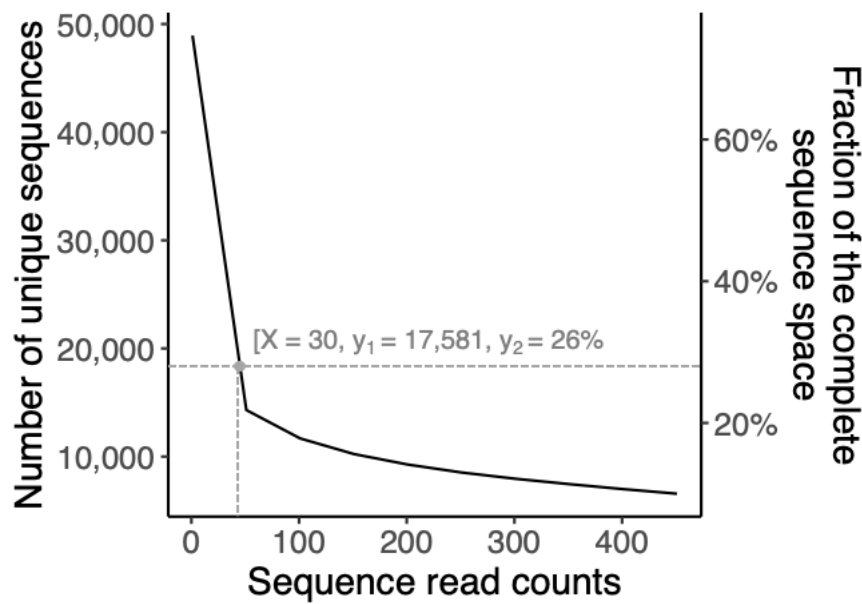

164

165 **Supplementary Figure S7. Number of genotypes obtained by choosing different**

166 **sequencing depth (read count) cutoffs.** The plot shows the number of unique sequences

167 obtained when applying different sequencing depth (read count) cutoffs. The x-axis represents

168 different read count thresholds in the interval (1, 500), indicating the minimum number of

169 required reads across all bins to include a genotype in our analysis. The left y-axis shows the

170 absolute number of unique sequences, while the right y-axis expresses this number as a

171 percentage of the complete sequence space of  $4^8$  sequences. When the read count threshold

172 equals one, the number of unique sequences is 48,937 genotypes, or approximately 75% of

173 genotype space. The dashed line represents the threshold of 30 reads we used in our analysis,

174 leading to 17,851 or 26% of genotype space. Source data are provided with this paper.



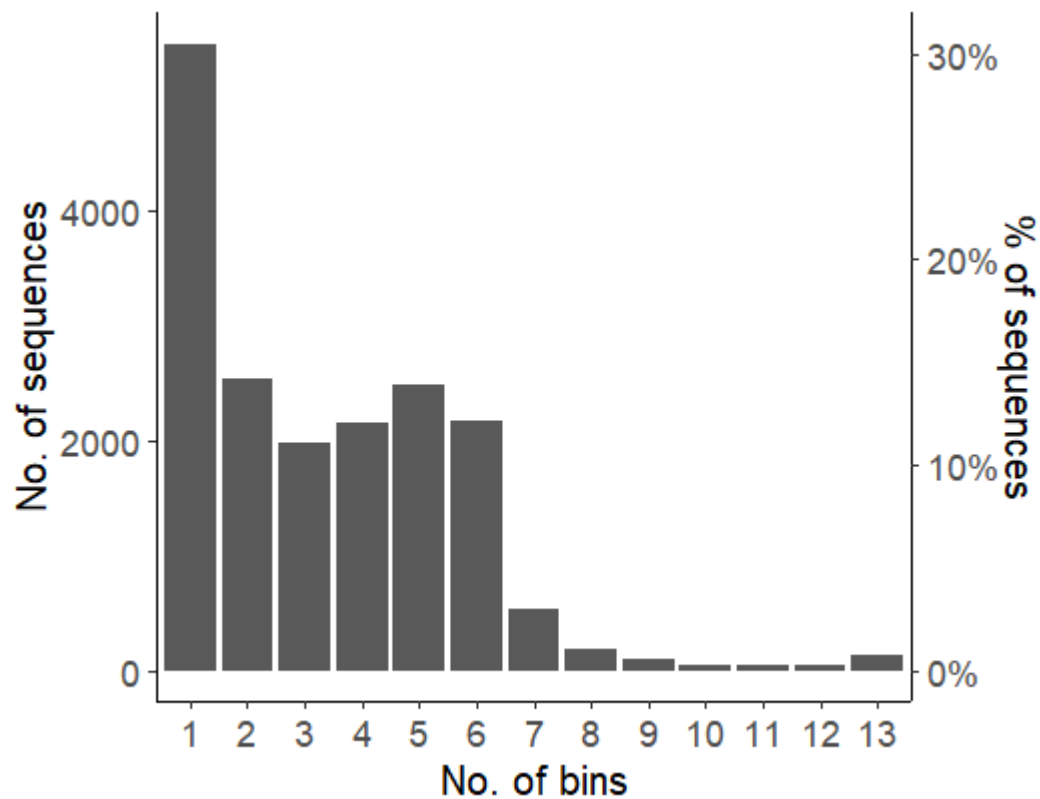

**Supplementary Figure S8. Number of bins per genotype.** The figure shows a histogram of the distribution of the number of bins (horizontal axis) into which each TFBS variant was sorted. The secondary vertical axis on the right shows the same information, but as a percentage of the total number of sequences (100% = 17,851 sequences). 32% of sequences were sorted only into a single bin; 65% of sequences were sorted into 2 to 6 bins. Source data are provided with this paper.

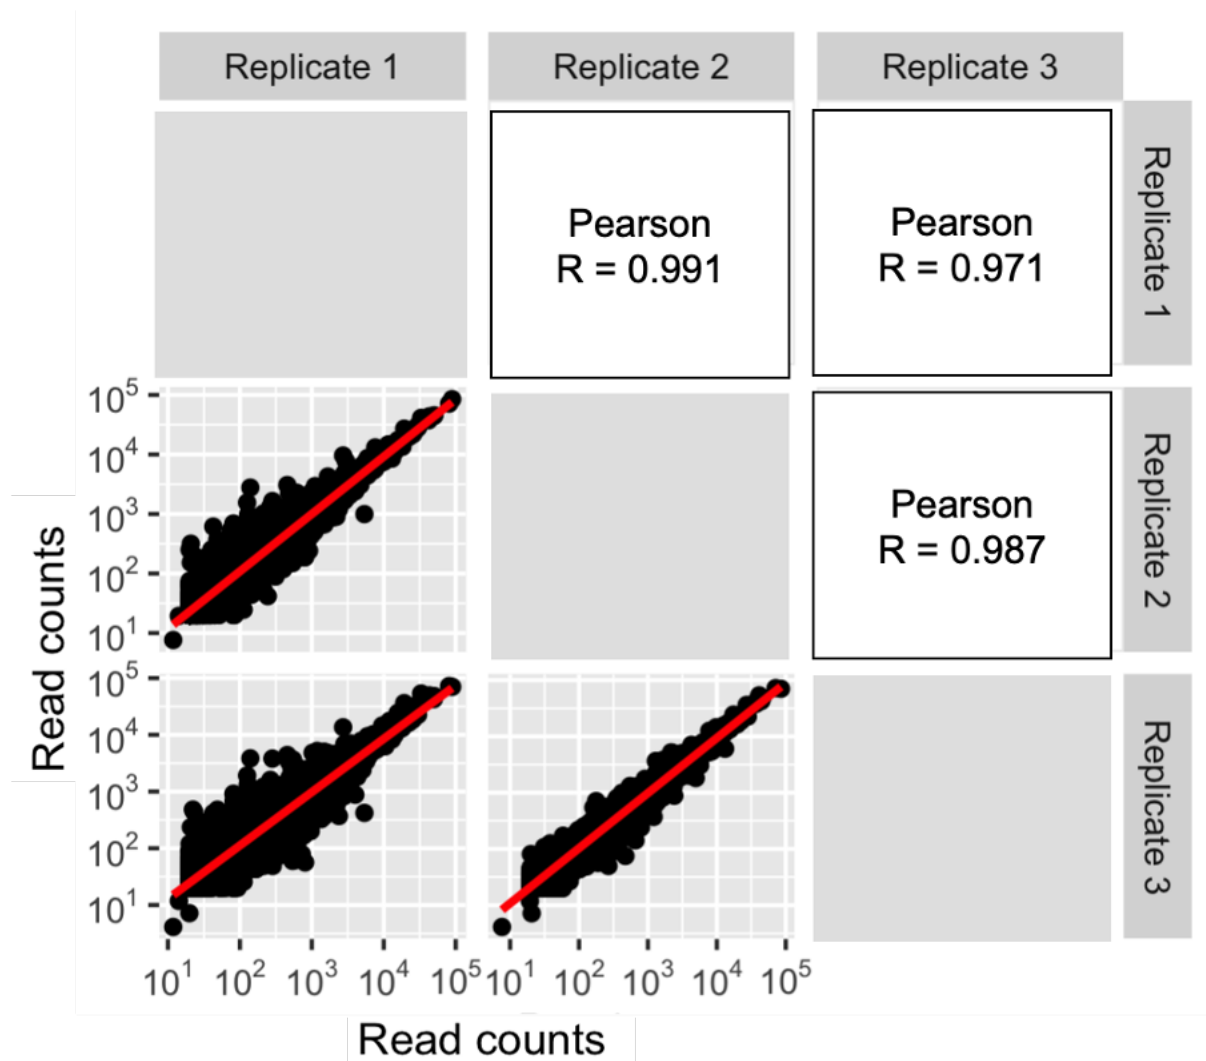

**Supplementary Figure S9. Correlation of read coverage among replicates of the *tetO2* mutant library.** Note the logarithmic scale in all panels. Correlation plots are represented as scatter plots in the lower panels, the red line in each plot is the  $x=y$  line. The R in the upper figure panels represent the Pearson correlation coefficients calculated for each pair of replicates. Source data are provided with this paper.

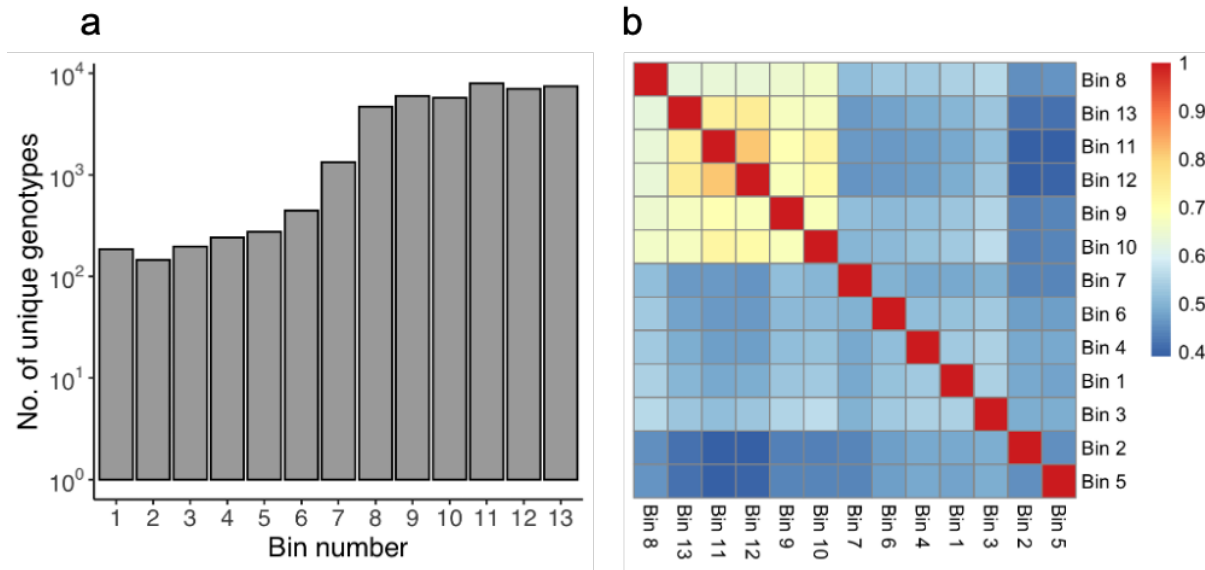

**Supplementary Figure S10. Genotypes per fluorescence bin and overlaps between them.**

**a. Number of individual genotypes per bin.** The vertical axis shows the number of unique genotypes per bin for each of the 13 fluorescence bins (horizontal axis) into which we sorted cells. Low fluorescence bins correspond to TFBS variants conferring strong repression, of which there are fewer, hence, there are also fewer unique genotypes in these bins. Source data are provided with this paper. **b. Heatmap of the fraction of genotypes shared between different bins.** The data is represented as a symmetric matrix of pairwise fractional overlaps calculated using the Jaccard index coefficient<sup>19,20</sup> between all possible pairs of the 13 bins. Each row and each column corresponds to a bin. Red values represent complete overlap between bin sequences and dark blue values represent the minimum overlap observed (40%). We ordered and clustered bins using an Euclidean distance with a complete-linkage clustering method. The Euclidean distance measures the similarity or dissimilarity between bins, and the complete-linkage clustering merge clusters based on the distance between their farthest points. Note that overlaps do not consider read counts. For example, two bins might share 40% of their sequences but the read count between the same sequence in each bin might differ by orders of magnitude. Note also that the overlap is greatest for high fluorescence bins, which also contain the most genotypes (panel a). The higher genotype overlap between higher bins (Bins 8-13)

215 can be explained by a higher number of cells sorted into these bins in comparison to lower bins.

216 Source data are provided with this paper.

217

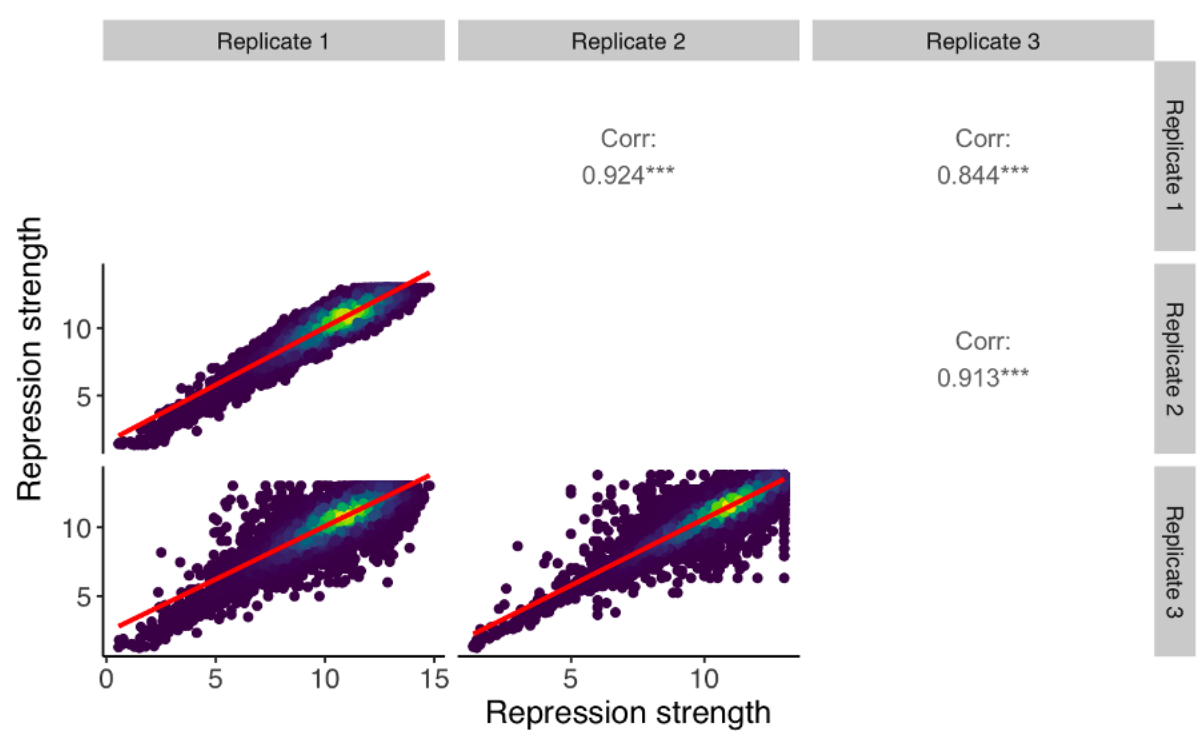

## Supplementary Figure S11. Reproducibility of estimated repression levels. Figure

**Legend.** Fluorescence-based sorting methods are inherently noisy, especially at the highest and lowest bounds of a fluorescence distribution. To assess how such variability could impact our estimate of repression strengths, we computed the correlation of repression strength derived from the fluorescence data between the three replicates we performed. Each point in each scatter plot represents a distinct genotype, plotted according to its repression strength in the two replicates indicated in the grey rectangles on the top and to the right of the plot matrix. The color gradient in the plots represents the density of genotypes (purple: low density; yellow: high density). The red line in each plot represents a linear model's fit to the data. Pearson correlation coefficients for the replicates are high ( $R=0.84$  to  $0.92$ , upper triangle of the plot matrix) and demonstrate high reproducibility of our estimates, although somewhat lower than for read counts (Supplementary Figure S9). Source data are provided with this paper.

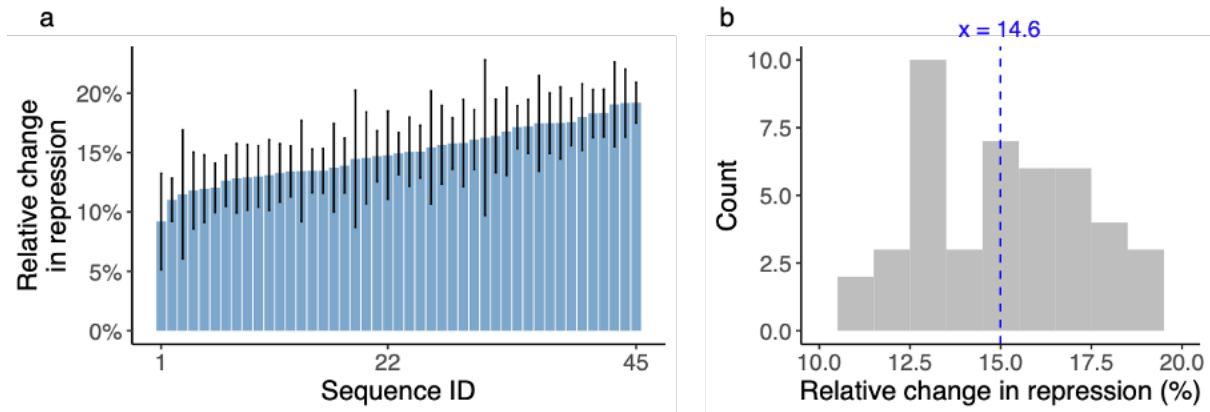

**Fig. S12. Validation of regulation strength differences in the lowest fluorescence bins (strongest repression).** **a.** Increase in repression strength expressed as a percentage relative to the wild-type, for 45 sequences with the highest repression strength, measured using a plate reader. The selected sequences repressed gene expression substantially more strongly than the WT, with a mean relative repression strength increase of  $14.6\% \pm 3.2\%$ . **b.** Histogram of the relative change in repression for the 45 selected sequences. The vertical dashed blue line indicates the mean repression strength increase relative to the wild-type of 14.6%. This difference is significantly greater than zero (Welch one-sample t-test,  $t = -55.737$ ,  $df = 44$ ,  $p\text{-value} < 2.2 \times 10^{-16}$ ). Source data are provided with this paper.

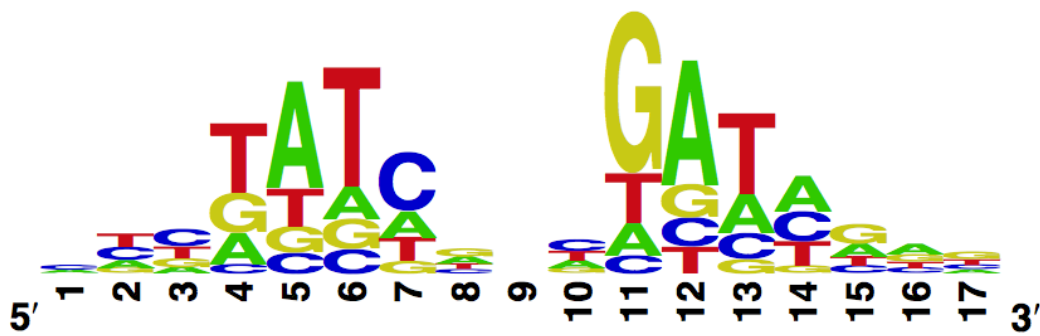

246

247 **Supplementary Figure S13. DNA Sequence logo obtained by a previous study.** Using  
 248 the MITOMI<sup>21</sup> in vitro technique, the 2011 iGEM team of the École polytechnique fédérale de  
 249 Lausanne (EPFL) studied the DNA binding landscape of the wild-type TetR sequence. To do  
 250 so, they designed and generated a library of double-stranded DNA sequences that covered all  
 251 possible single base substitutions within the *tetO2* binding site sequence. Based on that library,  
 252 the team measured the dissociation constants of each variant relative to the average constant of  
 253 all the *tetO2*-like variants of the library. Then, they determined the specificity of TetR for the  
 254 binding site variant sequences, expressed as a position-weight matrix (PWM). The figure  
 255 shows the corresponding DNA sequence logo. Original figure available at  
 256 [https://2011.igem.org/Team:EPF-Lausanne/Our\\_Project/TetR\\_mutants/MITOMI\\_data](https://2011.igem.org/Team:EPF-Lausanne/Our_Project/TetR_mutants/MITOMI_data)).

257

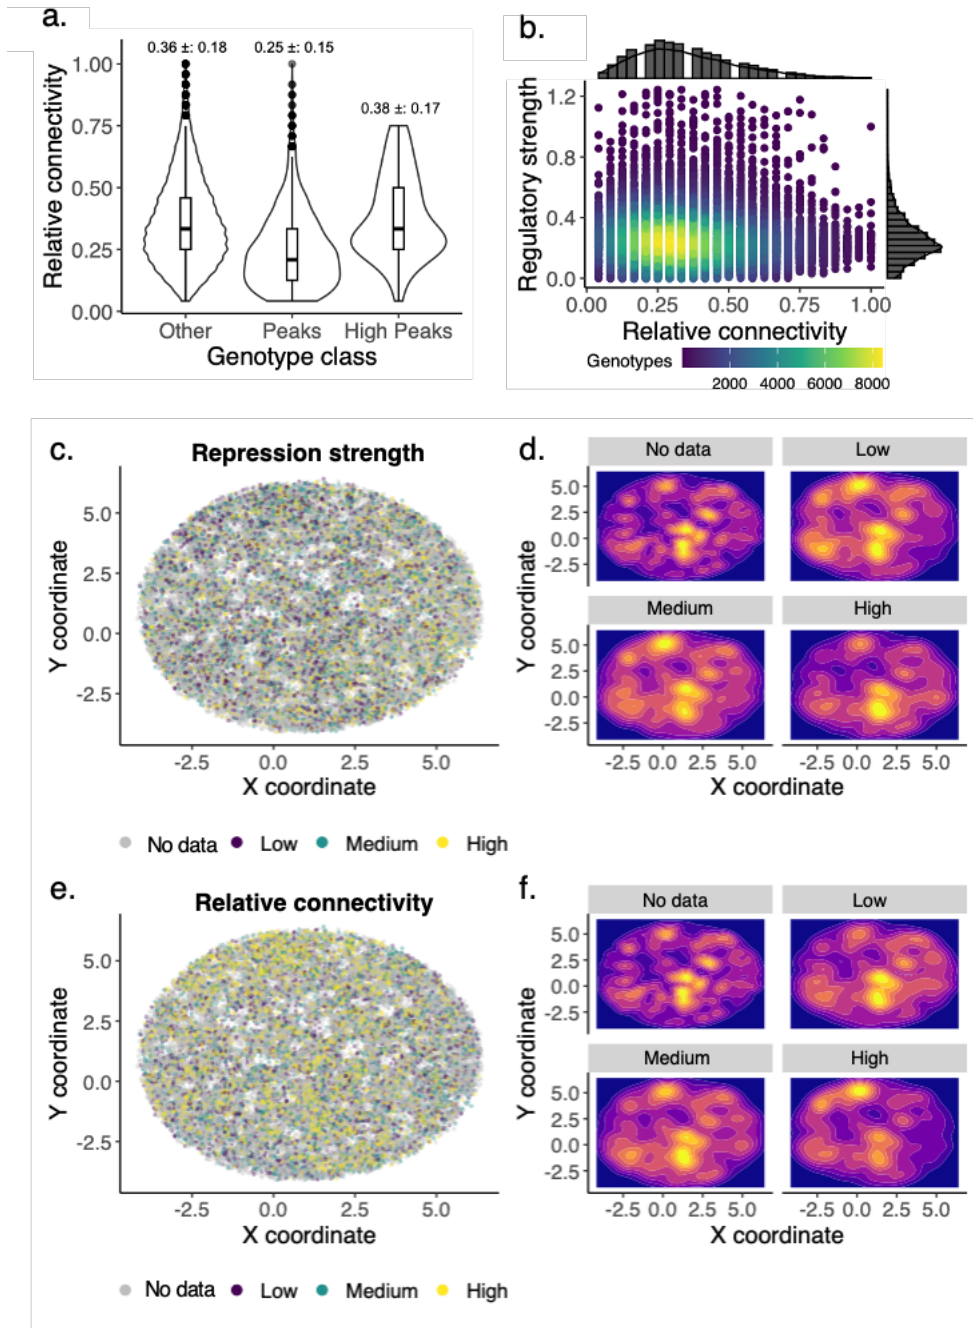

258

259 **Supplementary Figure S14. Quantitative analysis of TetR landscape sparsity. a.**

260 **Distribution of relative connectivity among genotypes.** Violin plots augmented with

261 embedded boxplots illustrate the distribution of relative connectivity, i.e., the ratio of the

262 empirically observed number of adjacent genotypes to the theoretical maximum number of

263  $24(=8 \times 3)$  within a fully connected network. Genotypes are stratified into the three categories:

264 "other" (non-peak genotypes), "peaks" (excluding high peaks), and "high peaks". Mean relative



connectivities and standard deviations are shown above each categorical division, revealing lower relative connectivity in peaks relative to non-peak genotypes (Two-sample Welch's t-test,  $p\text{-value} = 4.6 \times 10^{-177}$ ,  $N_1 = 15,671$ ;  $N_2 = 2,092$ ). High peaks exhibit superior connectivity relative to other peak genotypes (Two-sample Welch's t-test,  $p\text{-value} = 3.1 \times 10^{-144}$ ,  $N_1 = 2,092$ ;  $N_2 = 58$ ). High peaks exhibit comparable or superior connectivity relative to non-peak genotypes (Two-sample Welch's t-test,  $p\text{-value} = 1$ ,  $N_1 = 15,671$ ;  $N_2 = 58$ ). Source data are provided with this paper.

**b. Weak association between connectivity and repression strength.** Scatterplot of relative connectivity against repression strength. The density of genotypes (circles) in the scatterplot area is represented by a color gradient from purple (low density) to yellow (high density). The weak association (Pearson correlation,  $R = -0.13$ ;  $t = -23.888$ ; degrees of freedom ( $df$ ) = 31,973;  $p\text{-value} < 2.2e-16$ ) indicates that strongly regulating genotypes are not necessarily densely connected. Marginal histograms adjacent to the scatterplot quantify the distributions of repression strength and relative connectivity. Source data are provided with this paper.

**c. Visualization of TetR landscape based on repression strength.** Visual overview of the TetR landscape with genotypes color-coded according to repression strength (low strength: purple; medium: green; high: yellow; grey: genotypes with missing data). To enhance clarity, edges between genotypes are not shown. The landscape is projected onto a 2D space through a force-directed algorithm<sup>22</sup>, with axes representing arbitrary units. Source data are provided with this paper.

**d. Spatial distribution of repression strengths.** Each panel shows a density contour plot of the distribution of repression strength scores of genotypes within one of four repression strength categories (No data [genotypes with missing data], low, medium, high). It indicates the density of genotypes within each of the four categories through a color gradient from blue (low density) to yellow (high density). Source data are provided with this paper.

**e. Visualization of TetR landscape based on relative connectivity.** Analogous to panel c, but for relative connectivity. Color-codes indicate relative

290 connectivity (see color legend). Source data are provided with this paper. **f. Spatial**  
291 **distribution of relative connectivity.** Like panel d, but for four categories of relative  
292 connectivity (no data, low, medium, high). Source data are provided with this paper.

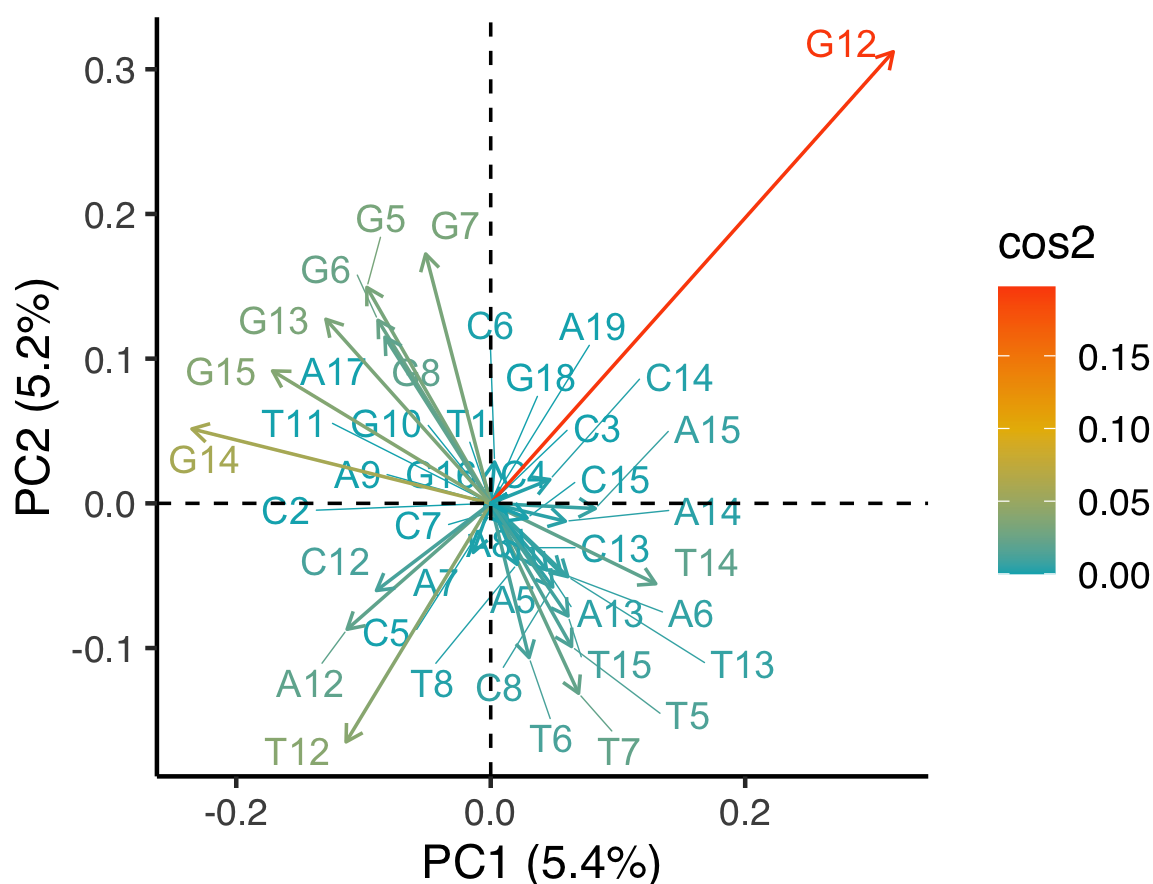

294

295

296 **Supplementary Figure S15. The contribution of individual *tetO2* nucleotides in principal**  
 297 **component analysis.** A PCA (Principal Component Analysis) contribution plot is a way to  
 298 visualize the relative importance of different variables to the variation observed in the data. In  
 299 this plot, the contribution of each variable is expressed as the square of the cosine of the angle  
 300 ( $\cos^2$ ) between the variable's vector (column representing the presence/absence of a base letter  
 301 at each position in the sequence) and each principal component axis. This quantity is  
 302 represented as an arrow that indicates the correlation of the variable with PC1 and PC2, the  
 303 two principal components that capture the largest amount of variation in the data. Both length  
 304 and color of the arrow represent the contribution of the variable to the variation observed in the  
 305 data. A high  $\cos^2$  value (red) indicates that the variable is strongly correlated with the principal

306 component, and therefore makes a large contribution to the variation observed in the data. A  
307 low  $\cos^2$  value (blue) indicates that the variable is weakly correlated with the principal  
308 component, and therefore makes a small contribution to the variation observed in the data. The  
309 arrow size represents the importance of the variable's contribution relative to other variables in  
310 the plot. Each nucleotide is represented as a base letter (A, T, C, G) followed by a number that  
311 indicates the position of that base in the binding site sequence (e.g., G12 stands for a guanine  
312 at position 12 of the binding site). Source data are provided with this paper.  
313

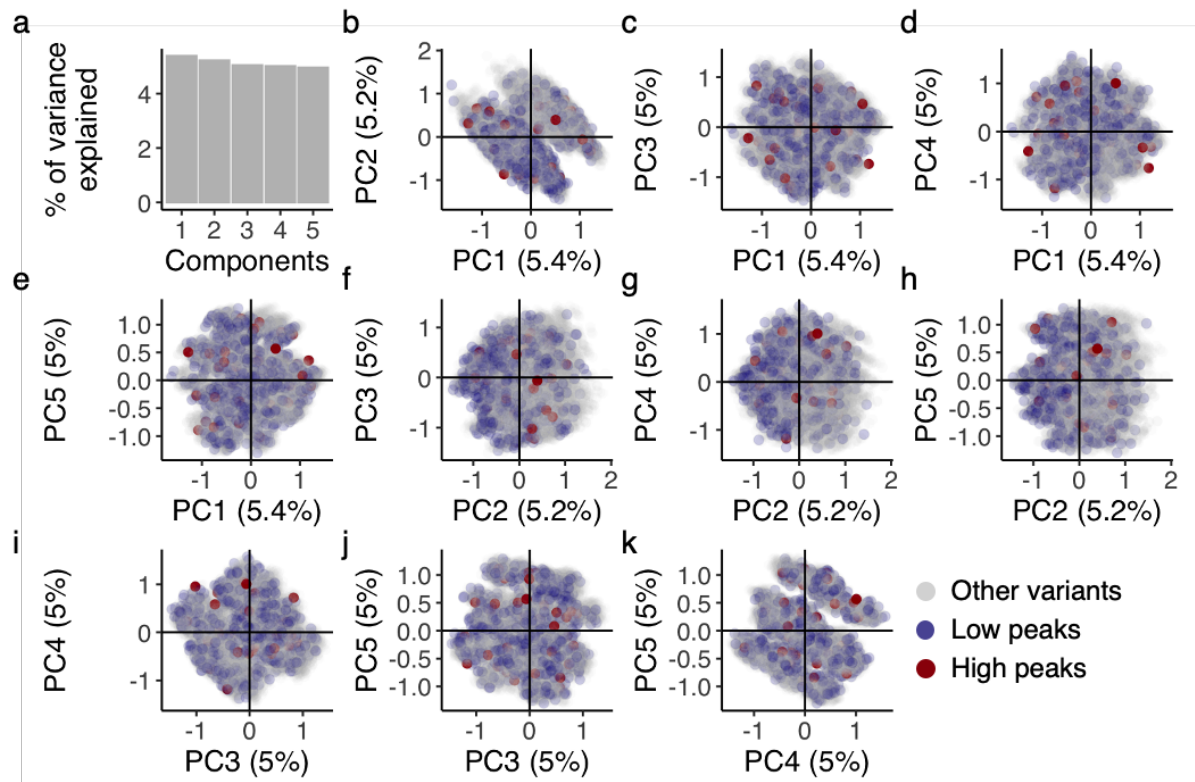

**Fig. S16. Principal component analysis (PCA) of peak and non-peak genotypes. a. The proportion of variation explained by each principal component.** Given the combinatorial complexity and high dimensionality of our genotype space, each principal component accounts for only a small fraction of the genetic variation. Source data are provided with this paper. **b-k. PCA plots for all pairs of the first five principal components.** We performed PCA after one-hot encoding all genotypes in the landscape. Each circle represents one of the 17,851 variants in the landscape, with colors indicating the class assigned to each genotype: non-peak variants are shown in grey, low peaks in blue, and high peaks in red. Source data are provided with this paper.

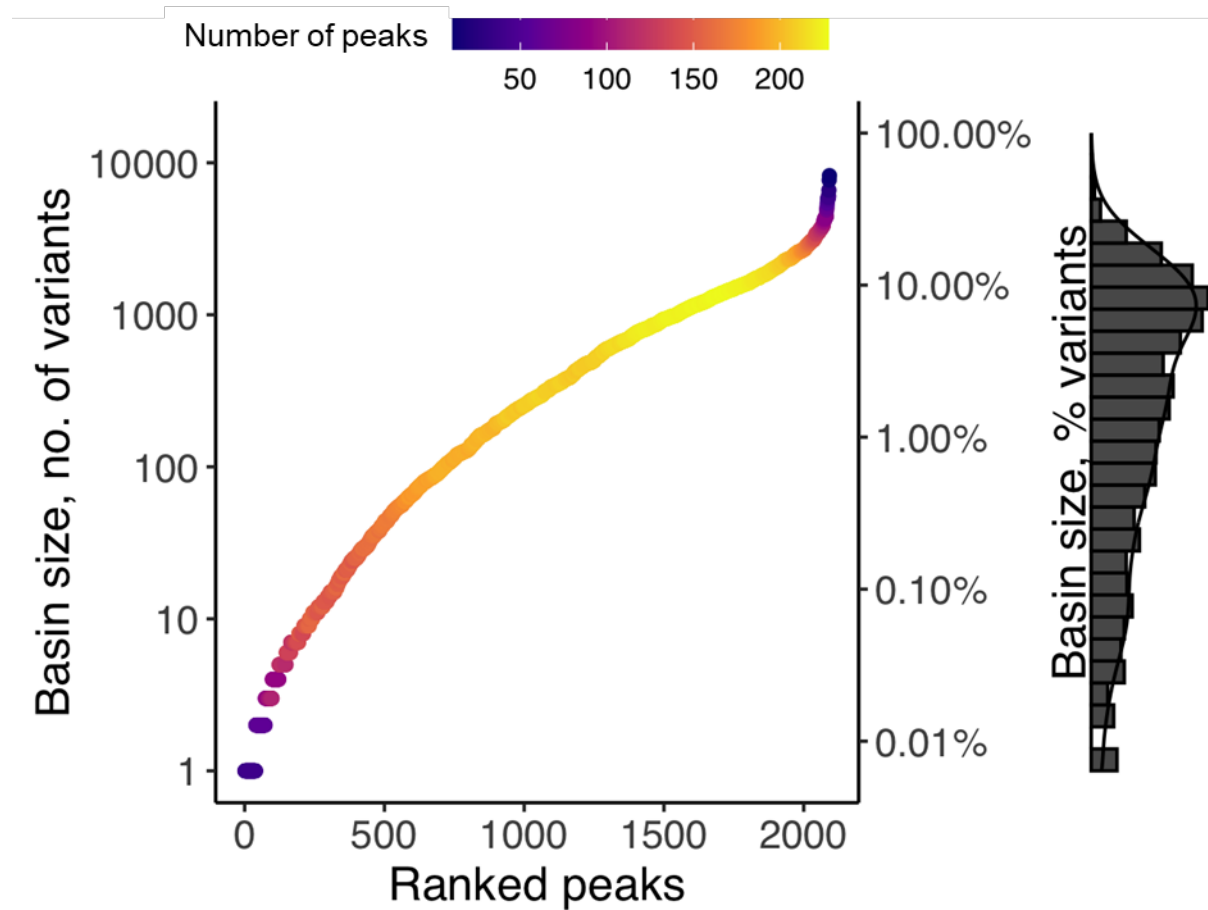

**Supplementary Figure S17. The distribution of basin sizes among peaks.** Peaks are ranked along the horizontal axis according to the size of their basins of attraction (vertical axis). The secondary vertical axis on the right represents basin size as a percentage of variants (100% = 17,765 variants). Heatmap colors represent the number of peaks at each position of the ranked scatterplot (see color legend). The marginal histogram on the right shows the distribution of basin sizes. Source data are provided with this paper.

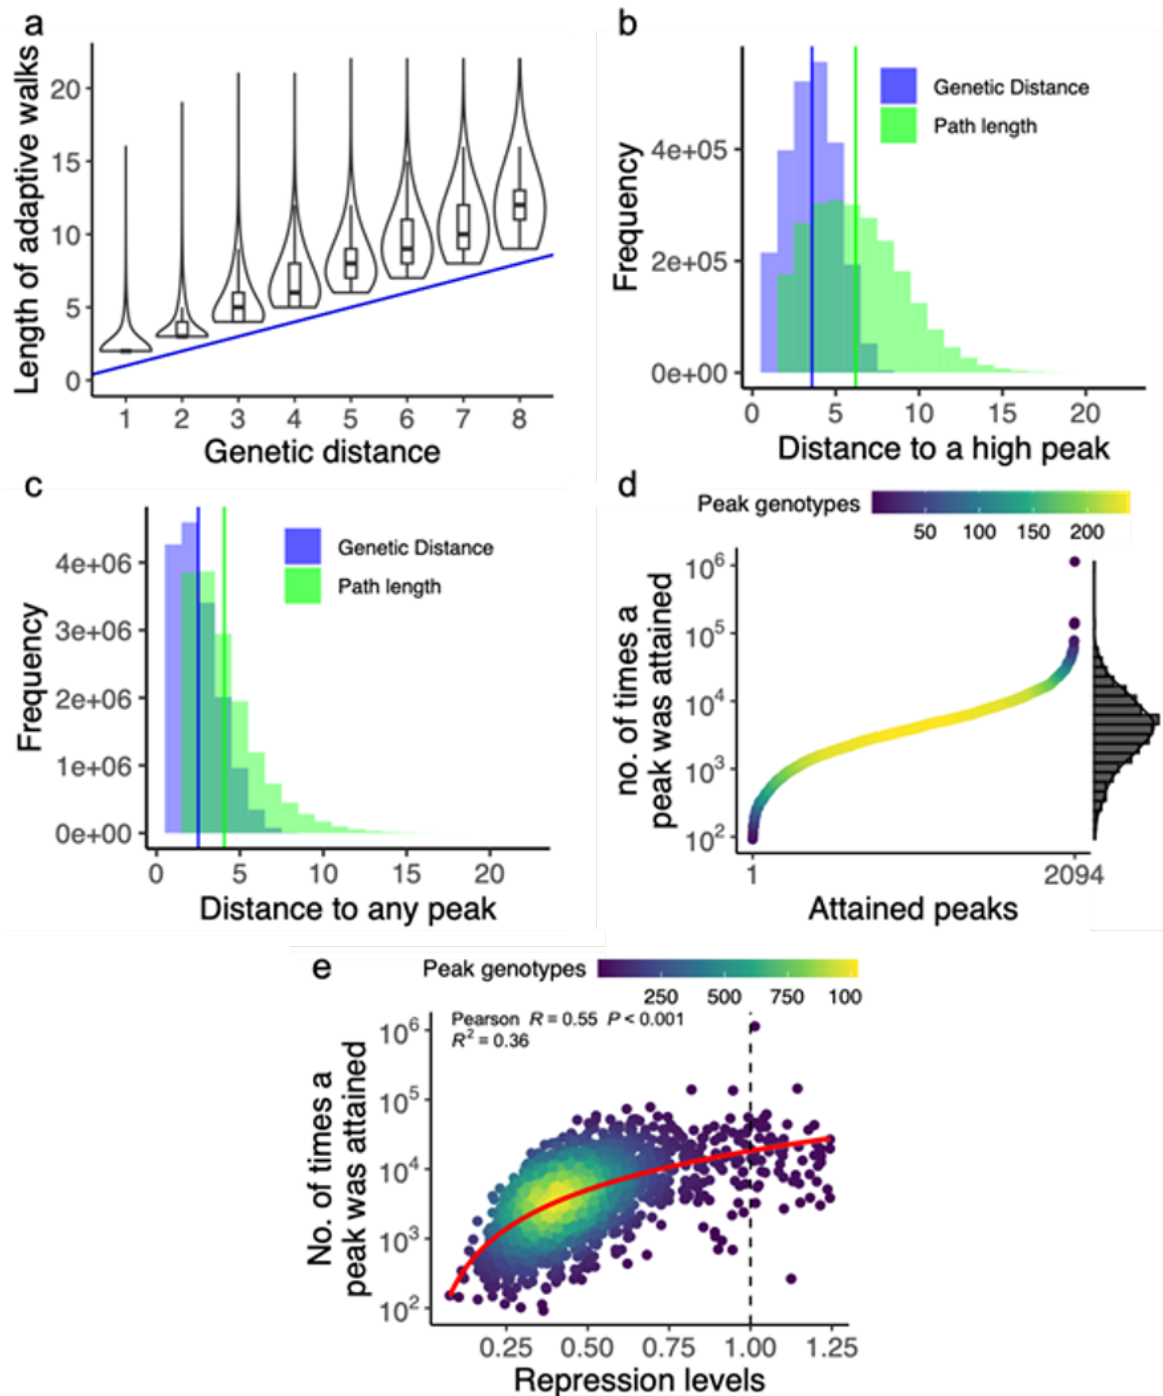

333

334 **Supplementary Figure S18. Adaptive walks in which each mutational step is chosen with**

335 **uniform probability among all repression-increasing steps.** Data displayed here are based

336 on 1,000 adaptive walks starting from each non-peak genotypic variant (N= 15,671). **a.**

337 **Adaptive walks leading to high repression peaks are predominantly short.** The vertical

338 axis presents the number of mutational steps in adaptive walks that initiate from a random

variant and converge at a high repression peak. The horizontal axis reflects the shortest genetic distances between the starting variant and the attained peak. The blue line ( $y=x$ ) signifies the most direct distance to a high repression peak, equated by the genetic distance. Violin plots summarize the shape of distributions with a probability density function. A wider probability density function indicates that a value on the y-axis occurs more frequently, and a narrower density function indicates that a value occurs less frequently. Each box covers the range between the first and third quartiles (IQR). The horizontal line within the box represents the median value, and whiskers span 1.5 times the IQR. Values beyond the 1.5 IQR interval are shown. Adaptive walks were only marginally longer than shortest paths. Source data are provided with this paper. **b. Accessible paths to high repression peaks tend to be short.** The blue histogram shows the distribution of the genetic distances for all pairs of variants and their respective attainable high peaks. The green histogram shows the distribution of the number of mutational steps for the shortest accessible paths between variants and their respective attainable peaks. Source data are provided with this paper. **c. Most accessible paths to any (high or low) repression peak are short.** The blue histogram shows the distribution of the genetic distances for all pairs of variants and their respective attainable peaks. The green histogram shows the distribution of the number of mutational steps for the shortest accessible paths between variants and their respective attainable peaks (high or low). Source data are provided with this paper. **d. Some peaks are attained more frequently than others.** We ranked all peaks along the horizontal axis according to the number of times they are reached across all adaptive walk simulations ( $N= 15.671 \times 10^3$ , vertical axis, note the logarithmic scale). The marginal density histogram on the right shows the distribution of the number of times each peak was reached from an individual variant. Heatmap colors represent the number of peaks at each position of the ranked scatterplot (see color legend). Source data are provided with this paper. **e. High peaks tend to be attained more often.** The scatter plot shows the repression



level conveyed by a peak variant (horizontal axis) and the number of times a peak with this repression level was reached across all adaptive walks ( $N = 15.671 \times 10^3$ , vertical axis, note the logarithmic scale). The dashed vertical line represents the repression level for the wild-type sequence. The red curve represents a semi-logarithmic linear regression line for the data, and the grey shade around it represents its 95% percent confidence interval.  $R$  is the linear Pearson correlation coefficient, and  $R^2$  is the goodness of fit of the logarithmic linear regression model ( $N = 15.671$ ). Heatmap colors represent the number of peaks at each position of the ranked scatterplot (see color legend). Source data are provided with this paper.

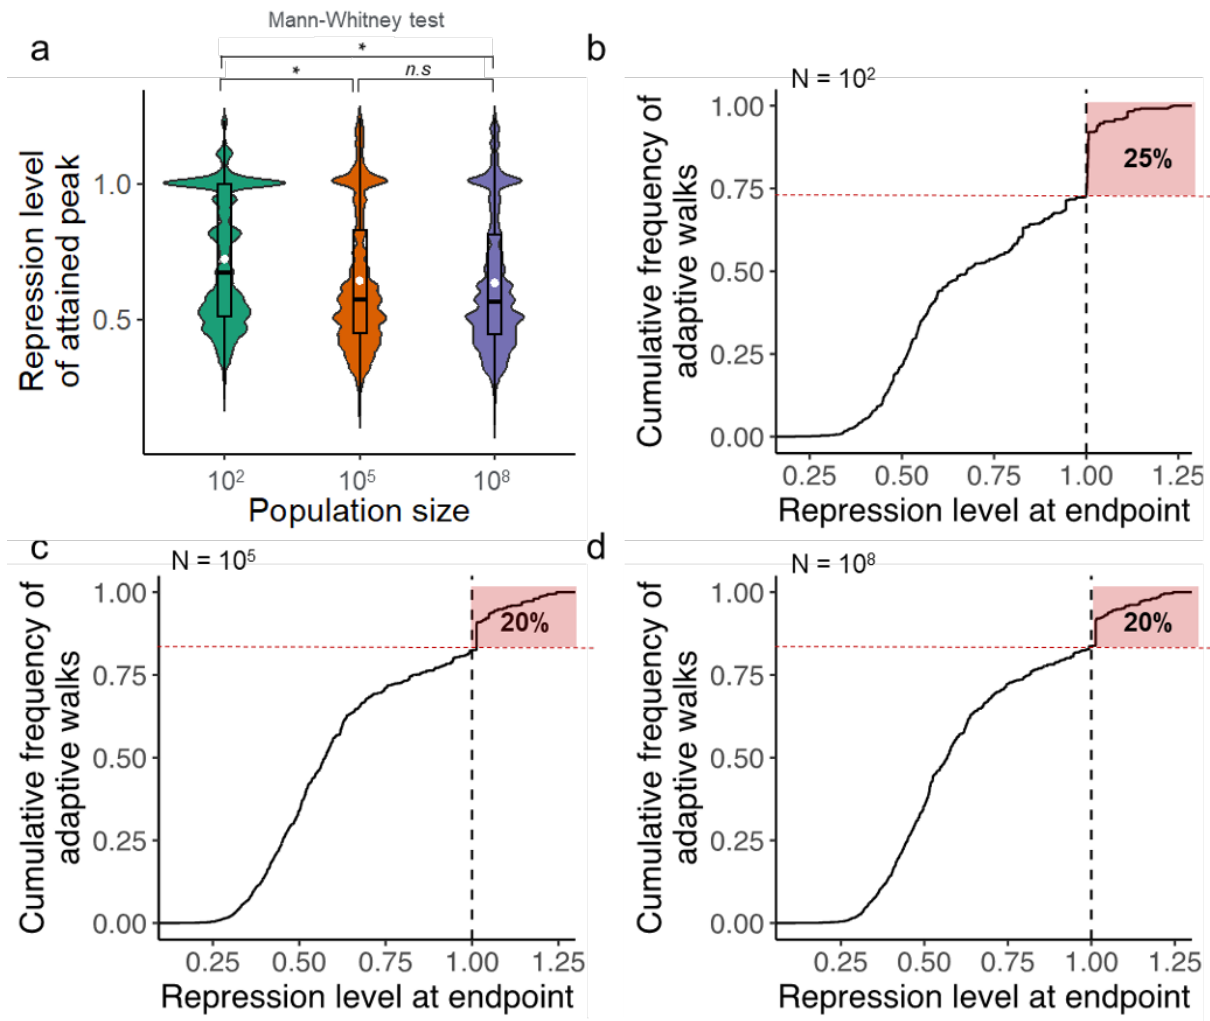

**Supplementary Figure S19. Adaptive walks using the Kimura model with different population sizes.** Data displayed here are based on  $10^6$  adaptive walks starting from  $10^3$  random variants ( $10^3$  random walks per variant) for small ( $N=10^2$ ), medium ( $N=10^5$ ) and large ( $N=10^8$ ) population sizes. **a. Distribution of repression levels of attained peaks for each population size.** Violin plots summarize the shape of distributions for each population size (horizontal axis). Each box covers the range between the first and third quartiles (IQR). The horizontal line within the box represents the median value, and whiskers span 1.5 times the IQR. The white circle inside each boxplot represents the mean of each distribution, which is  $0.72 \pm 0.34$ ,  $0.64 \pm 0.25$  and  $0.63 \pm 0.25$  (mean  $\pm$  s.d.) for small, medium, and large population sizes, respectively. The median repression level of attained peaks for small populations ( $10^2$ ) is significantly higher than that for medium and large populations (two-sided Mann–Whitney

385  $U = 425,000,000$ ,  $n1 = 10^6$ ,  $n2 = 10^6$ ,  $p = 2.13 \times 10^{-15}$ ). Source data are provided with this  
386 paper. **b-d. Small population sizes attain higher peaks.** Each panel shows the cumulative  
387 distribution of repression values reached by  $10^6$  adaptive walks starting from 1,000 random  
388 variants (1,000 walks per variant) in the landscape (**Methods**). The population size of each  
389 panel is represented by the  $N$  letter on the upper left of each plot. The dashed vertical line  $x=1$   
390 shows the repression value of the wild type. The area highlighted in red corresponds to the  
391 percentages of adaptive walks that reached peaks with repression 1 or greater; 25%, 20% and  
392 20% of adaptive walks for small, medium, and large population sizes, respectively. Source data  
393 are provided with this paper.

394

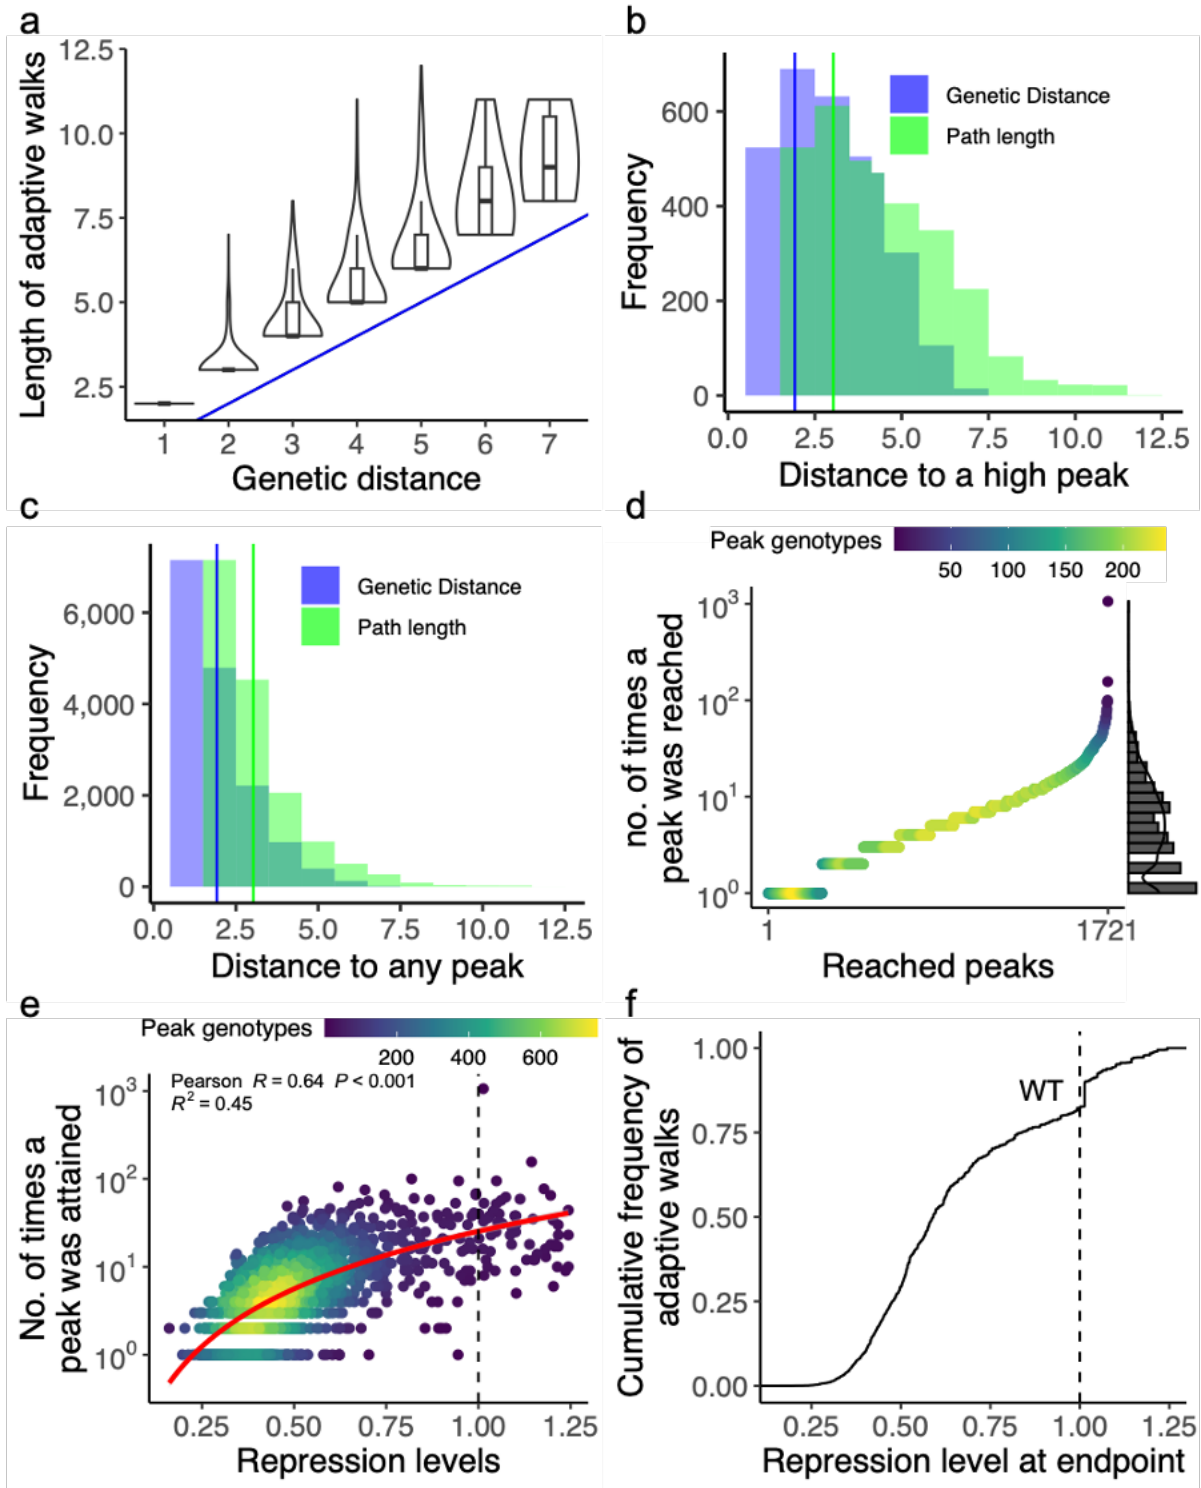

**Supplementary Figure S20. Greedy adaptive walk simulations.** We performed one greedy adaptive walk starting from each of  $N = 15,671$  non-peak genotypes (**Methods**). Each such walk is deterministic. **a. Adaptive walks leading to high repression peaks are predominantly short.** The vertical axis presents the number of mutational steps in adaptive

walks that initiate from a random variant and converge at a high repression peak. The horizontal axis reflects the shortest genetic distances between the starting variant and the attained peak. The blue line ( $y=x$ ) signifies the most direct distance to a high repression peak, equated by the genetic distance. Violin plots summarize the shape of distributions with a probability density function. A wider probability density function indicates that a value on the y-axis occurs more frequently, and a narrower density function indicates that a value occurs less frequently. Each box covers the range between the first and third quartiles (IQR). The horizontal line within the box represents the median value, and whiskers span 1.5 times the IQR. Values beyond the 1.5 IQR interval are shown. Adaptive walks were only marginally longer than shortest paths. Source data are provided with this paper. **b. Accessible paths to high repression peaks tend to be short.** The blue histogram shows the distribution of the genetic distances for all pairs of variants and their respective attainable peaks. The green histogram shows the distribution of the number of mutational steps for the shortest accessible paths between variants and their respective attainable peaks. Source data are provided with this paper. **c. Most accessible paths to any (high or low) repression peak are short.** The blue histogram shows the distribution of the genetic distances for all pairs of variants and their respective attainable peaks. The green histogram shows the distribution of the number of mutational steps for the shortest accessible paths between variants and their respective attainable peaks (high or low). Source data are provided with this paper. **d. Some peaks are attained more frequently than others.** We ranked all peaks along the horizontal axis according to the number of times they are reached across all adaptive walk simulations ( $N=15,671$ , vertical axis, note the logarithmic scale). The marginal density histogram on the right shows the distribution of the number of times each peak was reached from an individual variant. Heatmap colors represent the number of peaks at each position of the ranked scatterplot (see color legend). Source data are provided with this paper. **e. High peaks tend to be reached more often.** The scatter plot shows the repression

level conveyed by a peak variant (horizontal axis) and the number of times a peak with this repression level was reached across all adaptive walks ( $N = 15.671$ , vertical axis, note the logarithmic scale). The dashed vertical line represents the repression level for the wild-type sequence. The red curve represents a semi-logarithmic linear regression line for the data, and the grey shade around it represents its 95% percent confidence interval.  $R$  is the linear Pearson correlation coefficient, and  $R^2$  is the goodness of fit of the logarithmic linear regression model ( $N = 15.671$ ). Heatmap colors represent the number of peaks at each position of the ranked scatterplot (see color legend). Source data are provided with this paper. **f. High repression peaks are attainable through adaptive evolution.** The panel shows the cumulative distribution of repression values reached by  $10^3$  adaptive walks starting from each non-peak variant in the landscape (Methods). The dashed vertical line at  $x=1$  shows the repression value of the wild type. Only 20% of adaptive walks reached a repression value of 1 or higher. Source data are provided with this paper.

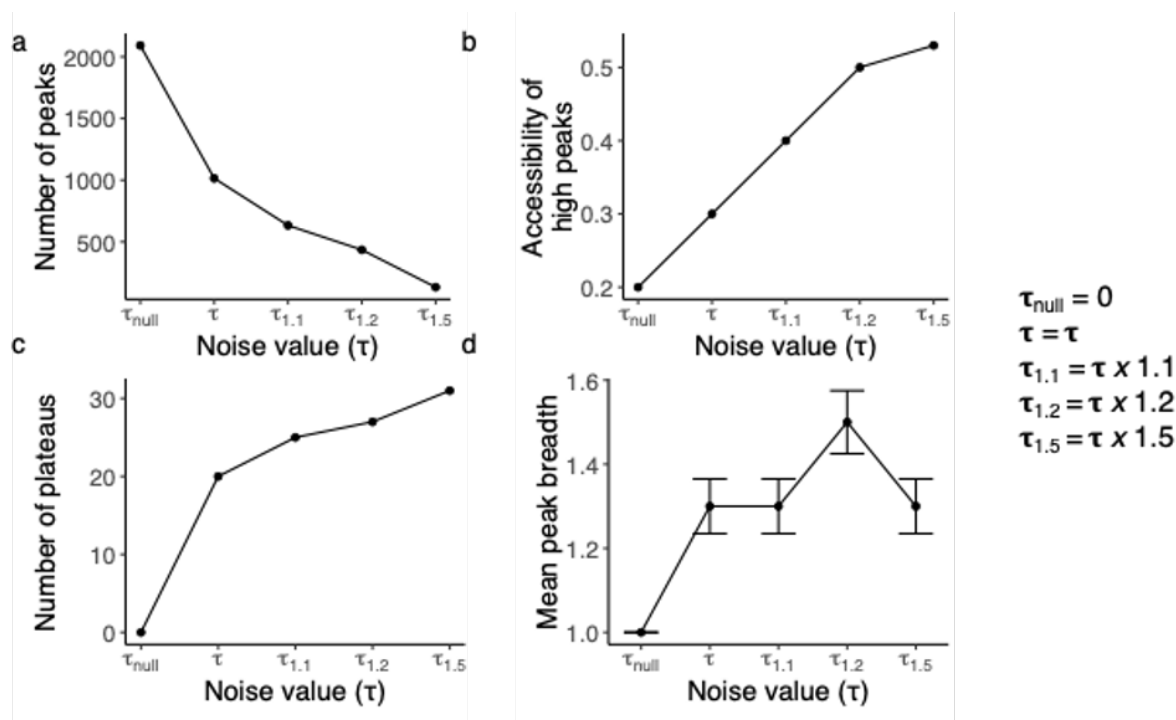

451

452 **Supplementary Figure S21. The effect of experimental measurement noise on landscape**

453 **features.** In each panel, the horizontal axis shows varying simulated levels of experimental

454 noise in measuring repression strengths that we used to determine how various landscape

455 features (vertical axes) depend on such noise. Specifically,  $\tau_{\text{null}}$  reflects the assumption that all

456 measurements are noise-free. Other noise values ( $\tau$  to  $\tau_{1.5}$ ), legend on right-hand side) depend

457 on  $\tau$ , the standard deviation of a genotype's measured repression strengths across the three

458 replicate experiments we performed (**Methods**). In the plots, the symbol  $\tau$  corresponds to the

459 actual experimental noise estimated from the data. Increasing experimental noise **a)** reduces

460 the number of peaks, **b)** increases the accessibility of high peaks, **c)** increases the number of

461 plateaus (cluster of connected neighboring peaks, **Methods**) and **d)** increases mean peak

462 breadth. Peak breadth reflects the number of peaks composing a plateau and the mean peak

463 breadth, the average number of peaks in each plateau. Error bars depict the diversity in the

464 number of peaks composing individual plateaus. Source data are provided with this paper.

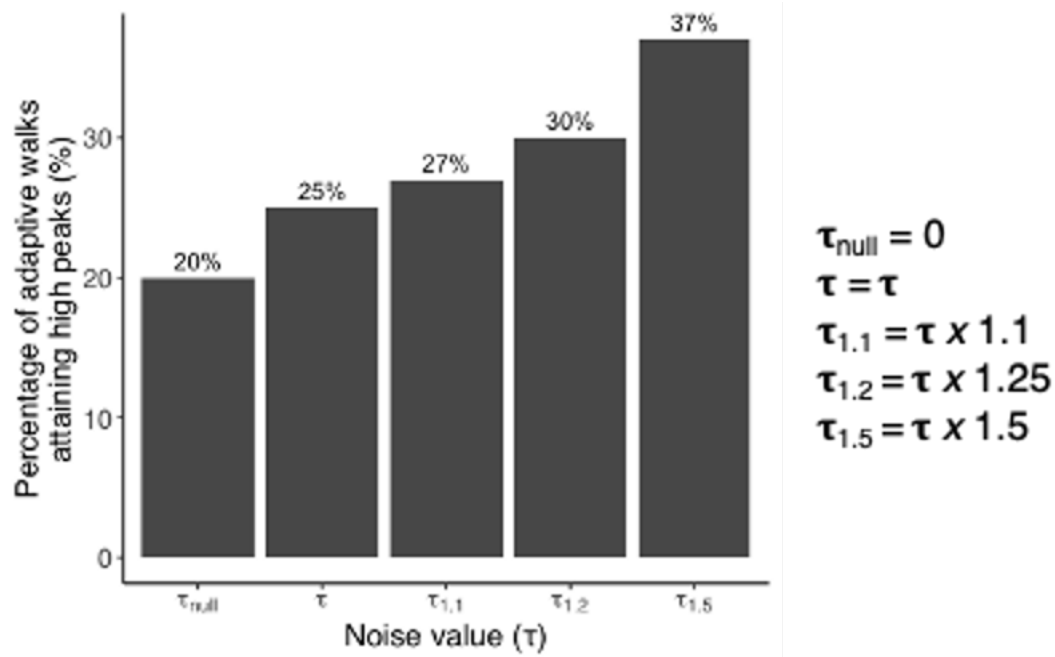

**Supplementary Figure S22. The effect of experimental measurement noise on the accessibility of high peaks.** The bar plot shows the percentage of adaptive walks (vertical axis, out of  $10^6$  walks,  $10^3$  adaptive walks from the same  $10^3$  starting genotypes at each noise value) reaching high peaks on landscapes generated with different noise levels (horizontal axis, Supplementary Materials 11). Specifically,  $\tau_{null}$  corresponds to the assumption that all measurements are noise-free. Other noise values ( $\tau$  to  $\tau_{1.5}$ ), legend on right-hand side) depend on  $\tau$ , the standard deviation of a genotype's measured repression strengths across the three replicate experiments we performed (**Methods**). As noise increases, the landscape becomes smoother (**Supplementary Figure S21**) and the percentage of adaptive walks reaching high peaks increases. Source data are provided with this paper.



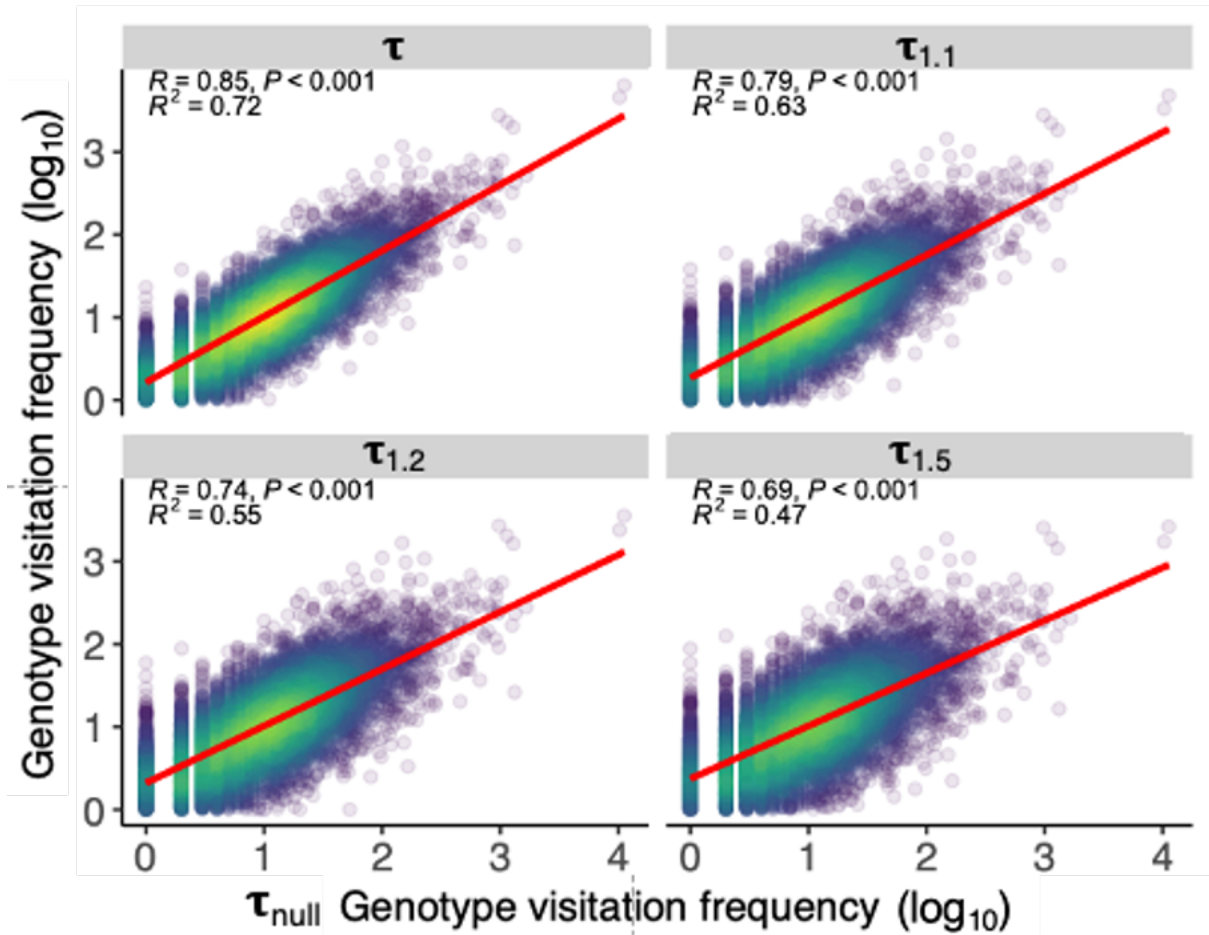

**Supplementary Figure S23. Experimental measurement noise has little impact on genotype visitation during adaptive walks.** The figure presents a pairwise comparison of the log-transformed number of visits to each genotype in Kimura adaptive random walks starting from 1,000 different genotypes, with 1,000 walks per starting genotype, across distinct experimental noise levels ( $\tau_{null}=0$ ,  $\tau=\tau$ ,  $\tau_1=1.1\tau$ ,  $\tau_{1.2}=0.25\tau$ ,  $\tau_{1.5}=1.5\tau$ ). Each circle represents the visitation frequency of a distinct genotype in all  $10^6$  adaptive walks, i.e., the number of times each genotype is visited during these walks. Each plot compares the visitation frequency in the absence of experimental noise (x-axis) with the visitation frequency at various noise levels (y-axis, noise level on the top of each panel in grey). The density of genotypes within each plot is indicated by colors (low: purple, high: yellow). The red line in each plot depicts a linear model's fit to the data, illustrating the association between the frequency of visitation of genotypes across distinct noise values. Spearman correlation coefficients ( $R$ ) are indicated at

490 the top of each graph, along with the corresponding p-value for testing the null hypothesis that  
491  $R=0$ . Source data are provided with this paper.

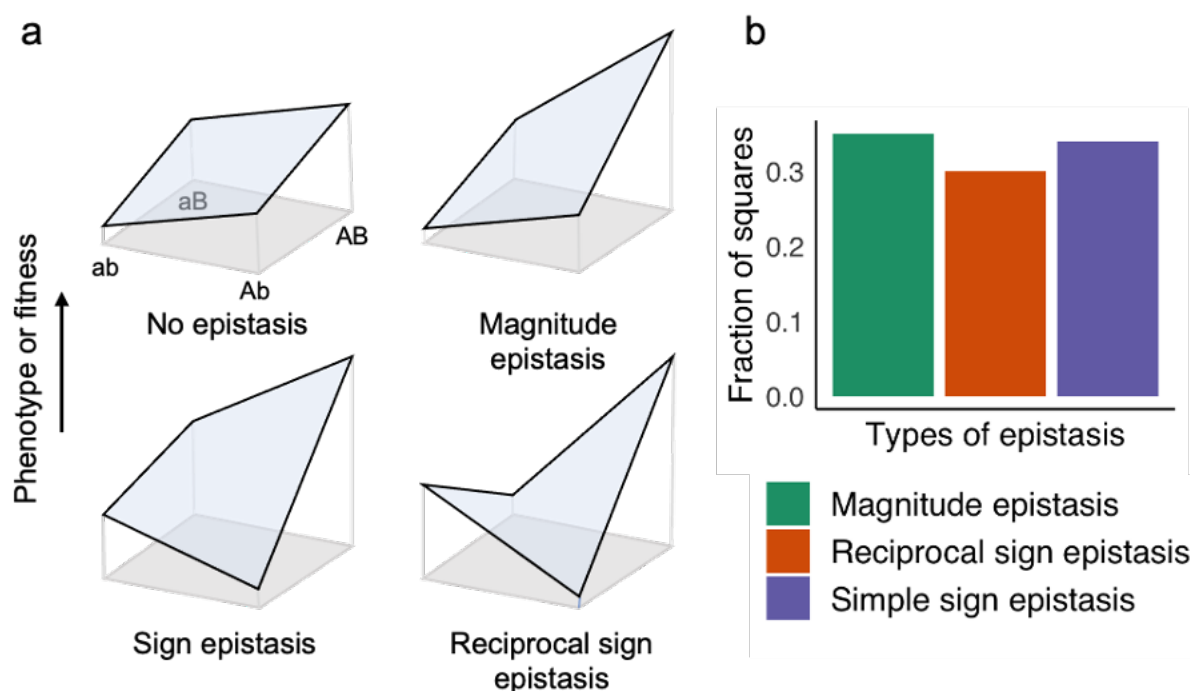

**Supplementary Figure S24. Epistatic interactions can influence adaptation and, hence, the ruggedness of adaptive landscapes. a. Overview of epistatic interactions.** A ‘wild-type’ sequence (ab) can change to a double mutant (AB) via the single mutations Ab or aB. The upper left panel shows a mutational path without epistasis, where the repression value of the double mutant is the sum of the repression contributions of both single mutants (additive interaction). Magnitude epistasis changes the magnitude, but not the sign of a resulting repression value. In the example, the repression value associated with the AB genotype is higher than the sum of the repression values for Ab and aB (second panel). Sign epistasis occurs when one single mutant (Ab) has a lower repression value than both the ‘wild type’ and the double mutant, while the other single mutant (aB) shows intermediate repression (third panel). In reciprocal sign epistasis, both single mutations decrease repression individually, but increase repression jointly (in the double mutant). Note that the relationship between fitness and repression is dependent on the studied system. In the case of TetR, we have assumed that fitness and repression are positively associated, based on previous studies exploring such relationship<sup>23–26</sup> Figure adapted from<sup>27</sup>. **b. Prevalence of three types of epistasis in the**

**landscape.** The bar plot shows the prevalence of the three major types of epistatic interactions (panel a) in our data ( $N=83,100$  double mutant pairs). The category called "no sign epistasis" comprises both magnitude epistasis and additivity (no epistasis), without any differentiation between them, as neither of them have an impact on peak accessibility <sup>28,29</sup>. Source data are provided with this paper.

## 524 References

525

- 526 1. Aguilar-Rodríguez, J., Payne, J. L. & Wagner, A. A thousand empirical adaptive  
527 landscapes and their navigability. *Nat Ecol Evol* **1**, 0045 (2017).
- 528 2. Khalid, F. *et al.* Genonets server-a web server for the construction, analysis and  
529 visualization of genotype networks. *Nucleic Acids Res* **44**, W70–W76 (2016).
- 530 3. Jahn, M., Vorpahl, C., Hübschmann, T., Harms, H. & Müller, S. Copy number variability  
531 of expression plasmids determined by cell sorting and droplet digital PCR. *Microb Cell*  
532 *Fact* **15**, 211 (2016).
- 533 4. Kelly, J. R. *et al.* Measuring the activity of BioBrick promoters using an in vivo reference  
534 standard. *J Biol Eng* **3**, 4 (2009).
- 535 5. Sanches-Medeiros, A., Monteiro, L. M. O. & Silva-Rocha, R. Calibrating Transcriptional  
536 Activity Using Constitutive Synthetic Promoters in Mutants for Global Regulators in  
537 *Escherichia coli*. *Int J Genomics* **2018**, 1–10 (2018).
- 538 6. Pédelacq, J. D., Cabantous, S., Tran, T., Terwilliger, T. C. & Waldo, G. S. Engineering and  
539 characterization of a superfolder green fluorescent protein. *Nat Biotechnol* **24**, 79–88  
540 (2006).
- 541 7. Hillen, W. & Berens, C. MECHANISMS UNDERLYING EXPRESSION OF TN10 ENCODED  
542 TETRACYCLINE RESISTANCE. <https://doi.org/10.1146/annurev.mi.48.100194.002021>  
543 **48**, 345–369 (2003).
- 544 8. Bertrand, K. P., Postle, K., Wray, L. V. & Reznikoff, W. S. Overlapping divergent  
545 promoters control expression of Tn10 tetracycline resistance. *Gene* **23**, 149–156  
546 (1983).
- 547 9. Meyer, A. J., Segall-Shapiro, T. H., Glassey, E., Zhang, J. & Voigt, C. A. *Escherichia coli*  
548 “Marionette” strains with 12 highly optimized small-molecule sensors. *Nature*  
549 *Chemical Biology* **2018 15:2 15**, 196–204 (2018).
- 550 10. Carr, S. B., Beal, J. & Densmore, D. M. Reducing DNA context dependence in bacterial  
551 promoters. *PLoS One* (2017) doi:10.1371/journal.pone.0176013.
- 552 11. Lutz, R. & Bujard, H. Independent and tight regulation of transcriptional units in  
553 *Escherichia coli* via the LacR/O, the TetR/O and AraC/I1-I2 regulatory elements. *Nucleic*  
554 *Acids Res* **25**, 1203–10 (1997).
- 555 12. Zaslaver, A. *et al.* A comprehensive library of fluorescent transcriptional reporters for  
556 *Escherichia coli*. *Nat Methods* **3**, 623–628 (2006).
- 557 13. Lou, C., Stanton, B., Chen, Y. J., Munsky, B. & Voigt, C. A. Ribozyme-based insulator  
558 parts buffer synthetic circuits from genetic context. *Nat Biotechnol* (2012)  
559 doi:10.1038/nbt.2401.
- 560 14. Vlková, M., Morampalli, B. R. & Silander, O. K. Efficiency of the synthetic self-splicing  
561 RiboJ ribozyme is robust to cis- and trans-changes in genetic background.  
562 *Microbiologyopen* **10**, e1232 (2021).
- 563 15. Salis, H. M., Mirsky, E. A. & Voigt, C. A. Automated Design of Synthetic Ribosome  
564 Binding Sites to Precisely Control Protein Expression. *Nat Biotechnol* **27**, 946 (2009).
- 565 16. Chen, Y. J. *et al.* Characterization of 582 natural and synthetic terminators and  
566 quantification of their design constraints. *Nat Methods* (2013)  
567 doi:10.1038/nmeth.2515.

17. Bolintineanu, D. S. *et al.* Investigation of changes in tetracycline repressor binding upon mutations in the tetracycline operator. *J Chem Eng Data* **59**, 3167–3176 (2014).
18. Wickham, H. *Ggplot2: Elegant Graphics for Data Analysis*. (Springer-Verlag New York, 2016).
19. Jaccard, P. THE DISTRIBUTION OF THE FLORA IN THE ALPINE ZONE.1. *New Phytologist* **11**, 37–50 (1912).
20. Papkou, A., Garcia-Pastor, L., Escudero, J. A. & Wagner, A. A rugged yet easily navigable fitness landscape of antibiotic resistance. *bioRxiv* 2023.02.27.530293 (2023) doi:10.1101/2023.02.27.530293.
21. Rockel, S., Geertz, M. & Maerkl, S. J. MITOMI: A microfluidic platform for in vitro characterization of transcription factor-DNA interaction. *Methods in Molecular Biology* (2012) doi:10.1007/978-1-61779-292-2\_6.
22. Csardi, G. The Igraph Software Package for Complex Network Research. (2014).
23. Berens, C. & Hillen, W. Gene regulation by tetracyclines. Constraints of resistance regulation in bacteria shape TetR for application in eukaryotes. *Eur J Biochem* **270**, 3109–3121 (2003).
24. Nguyen, T. N. M., Phan, Q. G., Duong, L. P., Bertrand, K. P. & Lenski, R. E. Effects of carriage and expression of the Tn10 tetracycline-resistance operon on the fitness of *Escherichia coli* K12. *Mol Biol Evol* **6**, 213–225 (1989).
25. Eckert, B. & Beck, C. F. Overproduction of transposon Tn10-encoded tetracycline resistance protein results in cell death and loss of membrane potential. *J Bacteriol* **171**, 3557–3559 (1989).
26. Rajer, F. & Sandegren, L. The Role of Antibiotic Resistance Genes in the Fitness Cost of Multiresistance Plasmids. *mBio* **13**, (2022).
27. Poelwijk, F. J., Kiviet, D. J., Weinreich, D. M. & Tans, S. J. Empirical fitness landscapes reveal accessible evolutionary paths. *Nature* (2007) doi:10.1038/nature05451.
28. Weinreich, D. M., Watson, R. A. & Chao, L. Perspective: Sign epistasis and genetic constraint on evolutionary trajectories. *Evolution* (2005).
29. Greene, D. & Crona, K. The Changing Geometry of a Fitness Landscape Along an Adaptive Walk. *PLoS Comput Biol* **10**, e1003520 (2014).
